# Supplementary material for: Dissolved iron in the North Atlantic Ocean and Labrador Sea along the GEOVIDE section (GEOTRACES section GA01)
Source: Copernicus journal article supplement (doi:10.5194/bg-2018-147), 2018-04-04
Supplement: Supplementary file 1 [file bg-2018-147-supplement.pdf]

Supplementary material

**S1: Table of dissolved iron (DFe) data for the whole GEOVIDE section. Bold characters denote stations located above the shelves. Note that QC refers to the data quality (1 = good data, 2 = questionable, 3 = bad data, were removed).**

| <b>Station</b> | <b>Lat</b>  | <b>Lon</b>  | <b>Bottle</b> | <b>Depth</b> | <b>DFe</b>         |                   |           | <b>QC</b>  |
|----------------|-------------|-------------|---------------|--------------|--------------------|-------------------|-----------|------------|
| <b>(#)</b>     | <b>(°N)</b> | <b>(°E)</b> | <b>(#)</b>    | <b>(m)</b>   | <b>(nmol kg-1)</b> | <b>(nmol L-1)</b> | <b>SD</b> | <b>(#)</b> |
| <b>1</b>       | 40.333      | -10.036     | 24            | 21           | 1.04               | 1.07              | ± 0.12    | 2          |
|                |             |             | 22            | 60           | 0.50               | 0.51              | ± 0.06    | 1          |
|                |             |             | 21            | 81           | 0.72               | 0.74              | ± 0.09    | 1          |
|                |             |             | 20            | 102          | 0.82               | 0.84              | ± 0.10    | 1          |
|                |             |             | 19            | 151          | 0.94               | 0.96              | ± 0.11    | 1          |
|                |             |             | 18            | 201          | 1.23               | 1.26              | ± 0.15    | 2          |
|                |             |             | 17            | 300          | 1.05               | 1.08              | ± 0.13    | 1          |
|                |             |             | 16            | 387          | 1.28               | 1.31              | ± 0.15    | 1          |
|                |             |             | 15            | 501          | 1.40               | 1.44              | ± 0.17    | 1          |
|                |             |             | 14            | 589          | 1.37               | 1.40              | ± 0.16    | 1          |
|                |             |             | 13            | 693          | 1.36               | 1.39              | ± 0.16    | 1          |
|                |             |             | 12            | 792          | 1.22               | 1.25              | ± 0.15    | 1          |
|                |             |             | 11            | 889          | 1.13               | 1.16              | ± 0.14    | 1          |
|                |             |             | 10            | 990          | 1.04               | 1.07              | ± 0.12    | 1          |
|                |             |             | 9             | 1185         | 1.18               | 1.21              | ± 0.14    | 1          |
|                |             |             | 8             | 1384         | 1.11               | 1.14              | ± 0.13    | 1          |
|                |             |             | 7             | 1582         | 1.40               | 1.44              | ± 0.17    | 2          |
|                |             |             | 6             | 1778         | 1.39               | 1.42              | ± 0.17    | 2          |
|                |             |             | 5             | 1976         | 0.67               | 0.69              | ± 0.08    | 1          |
|                |             |             | 4             | 2466         | 1.01               | 1.04              | ± 0.12    | 1          |
| 3              | 2957        | 1.60        | 1.64          | ± 0.19       | 2                  |                   |           |            |
| 2              | 3201        | 0.92        | 0.94          | ± 0.11       | 1                  |                   |           |            |
| 1              | 3521        | 0.80        | 0.82          | ± 0.10       | 1                  |                   |           |            |
| <b>2</b>       | 40.333      | -9.46       | 21            | 19           | 0.99               | 1.01              | ± 0.04    | 1          |
|                |             |             | 19            | 37           | 0.36               | 0.37              | ± 0.01    | 1          |
|                |             |             | 14            | 50           | 0.46               | 0.47              | ± 0.02    | 1          |
|                |             |             | 13            | 75           | 0.61               | 0.63              | ± 0.02    | 1          |
|                |             |             | 9             | 99           | 0.73               | 0.75              | ± 0.03    | 1          |
|                |             |             | 5             | 119          | 0.56               | 0.57              | ± 0.02    | 1          |
|                |             |             | 1             | 137          | 2.97               | 3.04              | ± 0.12    | 1          |

|    |        |         |    |      |      |      |        |   |
|----|--------|---------|----|------|------|------|--------|---|
| 4  | 40.333 | -9.767  | 23 | 21   | 0.71 | 0.73 | ± 0.03 | 2 |
|    |        |         | 21 | 39   | 0.33 | 0.34 | ± 0.01 | 1 |
|    |        |         | 19 | 71   | 0.51 | 0.52 | ± 0.02 | 1 |
|    |        |         | 15 | 149  | 0.59 | 0.60 | ± 0.02 | 1 |
|    |        |         | 13 | 200  | 0.87 | 0.89 | ± 0.03 | 2 |
|    |        |         | 11 | 300  | 0.55 | 0.56 | ± 0.02 | 1 |
|    |        |         | 9  | 398  | 0.72 | 0.74 | ± 0.03 | 1 |
|    |        |         | 7  | 496  | 0.79 | 0.81 | ± 0.03 | 1 |
|    |        |         | 5  | 596  | 0.84 | 0.86 | ± 0.03 | 1 |
|    |        |         | 3  | 694  | 1.00 | 1.03 | ± 0.04 | 1 |
| 11 | 40.333 | -12.219 | 1  | 792  | 0.83 | 0.85 | ± 0.03 | 1 |
|    |        |         | 24 | 15   | 0.12 | 0.12 | ± 0.01 | 1 |
|    |        |         | 23 | 25   | 0.27 | 0.28 | ± 0.02 | 3 |
|    |        |         | 22 | 54   | 0.19 | 0.19 | ± 0.01 | 1 |
|    |        |         | 21 | 80   | 0.18 | 0.18 | ± 0.01 | 1 |
|    |        |         | 20 | 100  | 0.23 | 0.24 | ± 0.02 | 1 |
|    |        |         | 19 | 199  | 0.28 | 0.29 | ± 0.02 | 1 |
|    |        |         | 16 | 497  | 0.55 | 0.56 | ± 0.04 | 1 |
|    |        |         | 14 | 695  | 0.74 | 0.76 | ± 0.05 | 1 |
|    |        |         | 13 | 793  | 0.79 | 0.81 | ± 0.06 | 1 |
| 13 | 41.383 | -13.888 | 12 | 991  | 0.76 | 0.78 | ± 0.05 | 1 |
|    |        |         | 11 | 1188 | 0.72 | 0.74 | ± 0.05 | 1 |
|    |        |         | 9  | 1582 | 0.80 | 0.82 | ± 0.06 | 1 |
|    |        |         | 8  | 1779 | 0.75 | 0.77 | ± 0.05 | 1 |
|    |        |         | 7  | 1976 | 0.76 | 0.78 | ± 0.05 | 1 |
|    |        |         | 6  | 2466 | 0.73 | 0.75 | ± 0.05 | 1 |
|    |        |         | 5  | 2954 | 0.85 | 0.87 | ± 0.06 | 1 |
|    |        |         | 4  | 3445 | 0.77 | 0.79 | ± 0.05 | 1 |
|    |        |         | 3  | 3933 | 0.68 | 0.70 | ± 0.05 | 1 |
|    |        |         | 2  | 4904 | 0.63 | 0.65 | ± 0.04 | 1 |
|    |        |         | 1  | 5241 | 0.61 | 0.63 | ± 0.04 | 1 |
|    |        |         | 24 | 11   | 0.22 | 0.23 | ± 0.02 | 1 |
|    |        |         | 23 | 30   | 0.26 | 0.27 | ± 0.03 | 1 |
|    |        |         | 22 | 51   | 0.25 | 0.26 | ± 0.02 | 1 |
|    |        |         | 21 | 75   | 0.35 | 0.36 | ± 0.03 | 1 |
|    |        |         | 20 | 100  | 0.50 | 0.51 | ± 0.05 | 1 |

|    |        |         |    |      |      |      |        |   |
|----|--------|---------|----|------|------|------|--------|---|
|    |        |         | 19 | 150  | 0.29 | 0.30 | ± 0.03 | 3 |
|    |        |         | 16 | 199  | 0.59 | 0.60 | ± 0.06 | 1 |
|    |        |         | 15 | 298  | 0.60 | 0.62 | ± 0.06 | 1 |
|    |        |         | 14 | 397  | 0.69 | 0.71 | ± 0.07 | 1 |
|    |        |         | 13 | 496  | 0.69 | 0.71 | ± 0.07 | 1 |
| 15 | 42.581 | -15.461 | 24 | 20   | 0.24 | 0.25 | ± 0.02 | 1 |
|    |        |         | 23 | 30   | 0.19 | 0.19 | ± 0.02 | 1 |
|    |        |         | 22 | 49   | 0.14 | 0.14 | ± 0.01 | 1 |
|    |        |         | 21 | 60   | 0.32 | 0.33 | ± 0.03 | 2 |
|    |        |         | 20 | 70   | 0.25 | 0.26 | ± 0.02 | 2 |
|    |        |         | 19 | 99   | 0.17 | 0.17 | ± 0.02 | 1 |
|    |        |         | 16 | 298  | 0.26 | 0.27 | ± 0.03 | 1 |
|    |        |         | 15 | 397  | 0.34 | 0.35 | ± 0.03 | 1 |
|    |        |         | 14 | 496  | 0.44 | 0.45 | ± 0.04 | 1 |
|    |        |         | 13 | 644  | 0.65 | 0.67 | ± 0.07 | 1 |
|    |        |         | 12 | 793  | 0.65 | 0.67 | ± 0.06 | 1 |
|    |        |         | 11 | 989  | 0.74 | 0.76 | ± 0.07 | 1 |
|    |        |         | 10 | 1089 | 0.72 | 0.74 | ± 0.07 | 1 |
|    |        |         | 9  | 1384 | 0.60 | 0.62 | ± 0.06 | 1 |
|    |        |         | 8  | 1581 | 0.68 | 0.70 | ± 0.07 | 1 |
|    |        |         | 7  | 1779 | 0.70 | 0.72 | ± 0.07 | 1 |
|    |        |         | 6  | 1975 | 0.65 | 0.67 | ± 0.06 | 1 |
|    |        |         | 5  | 2466 | 0.71 | 0.73 | ± 0.07 | 1 |
|    |        |         | 4  | 2956 | 0.73 | 0.75 | ± 0.07 | 1 |
|    |        |         | 3  | 3932 | 0.56 | 0.57 | ± 0.06 | 1 |
|    |        |         | 2  | 4904 | 0.53 | 0.54 | ± 0.05 | 1 |
|    |        |         | 1  | 5020 | 0.57 | 0.58 | ± 0.06 | 1 |
| 17 | 43.78  | -17.032 | 24 | 15   | 0.17 | 0.17 | ± 0.01 | 1 |
|    |        |         | 23 | 30   | 0.88 | 0.91 | ± 0.06 | 3 |
|    |        |         | 22 | 44   | 0.52 | 0.53 | ± 0.04 | 1 |
|    |        |         | 21 | 60   | 0.54 | 0.55 | ± 0.04 | 1 |
|    |        |         | 20 | 69   | 0.56 | 0.57 | ± 0.04 | 1 |
|    |        |         | 19 | 99   | 0.54 | 0.55 | ± 0.04 | 1 |
|    |        |         | 16 | 199  | 0.56 | 0.57 | ± 0.04 | 1 |
|    |        |         | 15 | 348  | 0.76 | 0.78 | ± 0.05 | 1 |
|    |        |         | 14 | 396  | 1.04 | 1.07 | ± 0.07 | 1 |

|    |        |         |    |      |      |      |        |   |
|----|--------|---------|----|------|------|------|--------|---|
|    |        |         | 13 | 496  | 0.96 | 0.98 | ± 0.07 | 1 |
|    |        |         | 12 | 595  | 1.03 | 1.06 | ± 0.07 | 1 |
|    |        |         | 11 | 792  | 1.21 | 1.24 | ± 0.08 | 1 |
|    |        |         | 10 | 990  | 1.08 | 1.11 | ± 0.08 | 1 |
|    |        |         | 9  | 1188 | 1.35 | 1.38 | ± 0.09 | 1 |
|    |        |         | 8  | 1385 | 1.23 | 1.26 | ± 0.09 | 1 |
|    |        |         | 7  | 1581 | 1.31 | 1.34 | ± 0.09 | 1 |
|    |        |         | 4  | 2465 | 1.25 | 1.28 | ± 0.09 | 1 |
|    |        |         | 3  | 2955 | 1.27 | 1.30 | ± 0.09 | 1 |
|    |        |         | 2  | 3444 | 1.31 | 1.34 | ± 0.09 | 1 |
| 19 | 45.05  | -18.505 | 24 | 20   | 0.09 | 0.09 | ± 0.01 | 1 |
|    |        |         | 23 | 30   | 0.31 | 0.32 | ± 0.03 | 3 |
|    |        |         | 22 | 40   | 0.17 | 0.17 | ± 0.02 | 1 |
|    |        |         | 21 | 50   | 0.10 | 0.10 | ± 0.01 | 1 |
|    |        |         | 20 | 99   | 0.17 | 0.17 | ± 0.02 | 1 |
|    |        |         | 19 | 200  | 0.31 | 0.32 | ± 0.03 | 1 |
|    |        |         | 16 | 298  | 0.23 | 0.24 | ± 0.02 | 1 |
|    |        |         | 15 | 397  | 0.36 | 0.37 | ± 0.04 | 1 |
|    |        |         | 14 | 496  | 0.48 | 0.49 | ± 0.05 | 1 |
|    |        |         | 13 | 595  | 0.53 | 0.54 | ± 0.05 | 1 |
|    |        |         | 12 | 793  | 0.71 | 0.73 | ± 0.07 | 1 |
|    |        |         | 11 | 991  | 0.74 | 0.76 | ± 0.07 | 1 |
|    |        |         | 10 | 1188 | 0.78 | 0.80 | ± 0.08 | 1 |
|    |        |         | 9  | 1386 | 0.68 | 0.70 | ± 0.07 | 1 |
|    |        |         | 8  | 1582 | 0.77 | 0.79 | ± 0.08 | 1 |
|    |        |         | 7  | 1779 | 0.78 | 0.80 | ± 0.08 | 1 |
|    |        |         | 6  | 1975 | 0.80 | 0.82 | ± 0.08 | 1 |
|    |        |         | 5  | 2221 | 0.86 | 0.88 | ± 0.09 | 1 |
|    |        |         | 4  | 2466 | 1.13 | 1.16 | ± 0.11 | 3 |
|    |        |         | 3  | 2955 | 0.87 | 0.89 | ± 0.09 | 1 |
|    |        |         | 2  | 3930 | 0.99 | 1.01 | ± 0.10 | 1 |
|    |        |         | 1  | 4538 | 0.99 | 1.01 | ± 0.10 | 1 |
| 21 | 46.544 | -19.672 | 24 | 19   | 0.17 | 0.17 | ± 0.01 | 1 |
|    |        |         | 23 | 30   | 0.28 | 0.29 | ± 0.02 | 2 |
|    |        |         | 22 | 49   | 0.20 | 0.21 | ± 0.01 | 1 |
|    |        |         | 21 | 79   | 0.14 | 0.14 | ± 0.01 | 1 |

|    |        |         |    |      |      |      |        |   |
|----|--------|---------|----|------|------|------|--------|---|
|    |        |         | 20 | 99   | 0.17 | 0.17 | ± 0.01 | 1 |
|    |        |         | 19 | 198  | 0.24 | 0.25 | ± 0.02 | 1 |
|    |        |         | 16 | 297  | 0.34 | 0.35 | ± 0.02 | 1 |
|    |        |         | 15 | 397  | 0.35 | 0.36 | ± 0.02 | 1 |
|    |        |         | 14 | 496  | 0.35 | 0.36 | ± 0.02 | 1 |
|    |        |         | 13 | 594  | 0.35 | 0.36 | ± 0.02 | 1 |
|    |        |         | 12 | 693  | 0.53 | 0.54 | ± 0.04 | 1 |
|    |        |         | 11 | 792  | 0.83 | 0.85 | ± 0.06 | 1 |
|    |        |         | 10 | 989  | 0.79 | 0.81 | ± 0.06 | 1 |
|    |        |         | 9  | 1236 | 0.76 | 0.78 | ± 0.05 | 1 |
|    |        |         | 8  | 1482 | 0.74 | 0.76 | ± 0.05 | 1 |
|    |        |         | 7  | 1976 | 0.81 | 0.83 | ± 0.06 | 1 |
|    |        |         | 6  | 2269 | 0.88 | 0.90 | ± 0.06 | 1 |
|    |        |         | 5  | 2759 | 0.70 | 0.72 | ± 0.05 | 1 |
|    |        |         | 4  | 2955 | 0.88 | 0.90 | ± 0.06 | 1 |
|    |        |         | 3  | 3442 | 0.78 | 0.80 | ± 0.05 | 1 |
|    |        |         | 2  | 4417 | 1.29 | 1.32 | ± 0.09 | 3 |
|    |        |         | 1  | 4506 | 0.71 | 0.73 | ± 0.05 | 1 |
| 23 | 48.039 | -20.848 | 24 | 20   | 0.17 | 0.17 | ± 0.01 | 1 |
|    |        |         | 23 | 29   | 0.18 | 0.18 | ± 0.01 | 1 |
|    |        |         | 22 | 40   | 0.15 | 0.15 | ± 0.01 | 1 |
|    |        |         | 21 | 50   | 0.18 | 0.18 | ± 0.01 | 1 |
|    |        |         | 20 | 60   | 0.25 | 0.26 | ± 0.02 | 1 |
|    |        |         | 19 | 70   | 0.28 | 0.29 | ± 0.02 | 1 |
|    |        |         | 16 | 100  | 0.34 | 0.35 | ± 0.02 | 1 |
|    |        |         | 15 | 199  | 0.73 | 0.75 | ± 0.05 | 1 |
|    |        |         | 14 | 397  | 0.66 | 0.68 | ± 0.05 | 1 |
|    |        |         | 13 | 594  | 0.32 | 0.33 | ± 0.02 | 3 |
|    |        |         | 12 | 792  | 0.73 | 0.75 | ± 0.05 | 1 |
|    |        |         | 10 | 1187 | 0.65 | 0.67 | ± 0.05 | 1 |
|    |        |         | 9  | 1384 | 0.69 | 0.71 | ± 0.05 | 1 |
|    |        |         | 8  | 1581 | 0.75 | 0.77 | ± 0.05 | 1 |
|    |        |         | 7  | 1778 | 0.70 | 0.72 | ± 0.05 | 1 |
|    |        |         | 6  | 1974 | 0.77 | 0.79 | ± 0.05 | 1 |
|    |        |         | 5  | 2269 | 0.92 | 0.94 | ± 0.06 | 1 |
|    |        |         | 4  | 2954 | 0.79 | 0.81 | ± 0.06 | 1 |

|    |        |         |    |      |      |      |        |   |
|----|--------|---------|----|------|------|------|--------|---|
|    |        |         | 3  | 3443 | 0.80 | 0.82 | ± 0.06 | 1 |
|    |        |         | 2  | 3930 | 0.62 | 0.64 | ± 0.04 | 1 |
|    |        |         | 1  | 4442 | 0.75 | 0.77 | ± 0.05 | 1 |
| 25 | 49.529 | -22.017 | 24 | 14   | 0.19 | 0.19 | ± 0.02 | 1 |
|    |        |         | 23 | 25   | 0.13 | 0.13 | ± 0.01 | 1 |
|    |        |         | 21 | 49   | 0.14 | 0.14 | ± 0.01 | 1 |
|    |        |         | 20 | 74   | 0.19 | 0.19 | ± 0.02 | 1 |
|    |        |         | 19 | 99   | 0.23 | 0.24 | ± 0.02 | 1 |
|    |        |         | 16 | 198  | 0.34 | 0.35 | ± 0.03 | 1 |
|    |        |         | 15 | 346  | 0.38 | 0.39 | ± 0.04 | 1 |
|    |        |         | 14 | 495  | 0.44 | 0.45 | ± 0.04 | 1 |
|    |        |         | 13 | 643  | 0.58 | 0.59 | ± 0.06 | 1 |
|    |        |         | 12 | 792  | 0.78 | 0.80 | ± 0.08 | 1 |
|    |        |         | 11 | 990  | 0.92 | 0.94 | ± 0.09 | 1 |
|    |        |         | 10 | 1187 | 0.76 | 0.78 | ± 0.08 | 1 |
|    |        |         | 9  | 1386 | 0.87 | 0.89 | ± 0.09 | 1 |
|    |        |         | 8  | 1580 | 0.87 | 0.89 | ± 0.09 | 1 |
|    |        |         | 7  | 1778 | 0.79 | 0.81 | ± 0.08 | 1 |
|    |        |         | 6  | 1974 | 0.87 | 0.89 | ± 0.09 | 1 |
|    |        |         | 5  | 2563 | 1.07 | 1.10 | ± 0.11 | 3 |
|    |        |         | 4  | 2955 | 0.84 | 0.86 | ± 0.08 | 1 |
|    |        |         | 3  | 3441 | 0.83 | 0.85 | ± 0.08 | 1 |
|    |        |         | 2  | 3930 | 1.03 | 1.06 | ± 0.10 | 1 |
|    |        |         | 1  | 4191 | 0.69 | 0.71 | ± 0.07 | 1 |
| 26 | 50.278 | -22.603 | 22 | 20   | 0.18 | 0.18 | ± 0.02 | 1 |
|    |        |         | 21 | 34   | 0.15 | 0.15 | ± 0.01 | 1 |
|    |        |         | 20 | 50   | 0.15 | 0.15 | ± 0.02 | 1 |
|    |        |         | 19 | 69   | 0.15 | 0.15 | ± 0.02 | 1 |
|    |        |         | 18 | 97   | 0.18 | 0.18 | ± 0.02 | 1 |
|    |        |         | 17 | 150  | 0.43 | 0.44 | ± 0.04 | 1 |
|    |        |         | 16 | 199  | 0.39 | 0.40 | ± 0.04 | 1 |
|    |        |         | 15 | 297  | 0.57 | 0.58 | ± 0.06 | 1 |
|    |        |         | 14 | 396  | 0.62 | 0.64 | ± 0.06 | 1 |
|    |        |         | 13 | 496  | 0.82 | 0.84 | ± 0.08 | 1 |
|    |        |         | 12 | 594  | 0.80 | 0.82 | ± 0.08 | 1 |
|    |        |         | 11 | 742  | 0.76 | 0.78 | ± 0.08 | 1 |

|    |        |         |    |      |      |      |        |   |
|----|--------|---------|----|------|------|------|--------|---|
|    |        |         | 10 | 891  | 0.74 | 0.76 | ± 0.07 | 1 |
|    |        |         | 9  | 989  | 0.83 | 0.85 | ± 0.08 | 1 |
|    |        |         | 8  | 1186 | 0.89 | 0.91 | ± 0.09 | 1 |
|    |        |         | 7  | 1384 | 0.83 | 0.85 | ± 0.08 | 1 |
|    |        |         | 6  | 1580 | 0.92 | 0.94 | ± 0.09 | 1 |
|    |        |         | 5  | 1974 | 0.90 | 0.92 | ± 0.09 | 1 |
|    |        |         | 4  | 2268 | 0.87 | 0.89 | ± 0.09 | 1 |
|    |        |         | 3  | 2953 | 0.75 | 0.77 | ± 0.08 | 1 |
|    |        |         | 2  | 3929 | 0.61 | 0.63 | ± 0.06 | 1 |
|    |        |         | 1  | 4116 | 0.63 | 0.65 | ± 0.06 | 1 |
| 29 | 53.019 | -24.752 | 22 | 15   | 0.17 | 0.17 | ± 0.02 | 1 |
|    |        |         | 21 | 25   | 0.75 | 0.77 | ± 0.08 | 2 |
|    |        |         | 20 | 50   | 0.66 | 0.68 | ± 0.07 | 2 |
|    |        |         | 19 | 75   | 0.52 | 0.53 | ± 0.05 | 1 |
|    |        |         | 18 | 99   | 0.64 | 0.66 | ± 0.06 | 1 |
|    |        |         | 17 | 149  | 0.71 | 0.73 | ± 0.07 | 1 |
|    |        |         | 16 | 198  | 1.14 | 1.17 | ± 0.11 | 1 |
|    |        |         | 15 | 298  | 1.02 | 1.05 | ± 0.10 | 1 |
|    |        |         | 14 | 397  | 0.98 | 1.00 | ± 0.10 | 1 |
|    |        |         | 13 | 495  | 0.95 | 0.97 | ± 0.09 | 1 |
|    |        |         | 11 | 791  | 0.98 | 1.00 | ± 0.10 | 1 |
|    |        |         | 10 | 890  | 1.10 | 1.13 | ± 0.11 | 1 |
|    |        |         | 9  | 1087 | 0.99 | 1.01 | ± 0.10 | 1 |
|    |        |         | 8  | 1185 | 0.85 | 0.87 | ± 0.09 | 1 |
|    |        |         | 7  | 1382 | 0.92 | 0.94 | ± 0.09 | 1 |
|    |        |         | 6  | 1581 | 0.93 | 0.95 | ± 0.09 | 1 |
|    |        |         | 5  | 1776 | 0.71 | 0.73 | ± 0.07 | 1 |
|    |        |         | 4  | 1973 | 0.65 | 0.67 | ± 0.06 | 1 |
|    |        |         | 3  | 2464 | 1.09 | 1.12 | ± 0.11 | 1 |
|    |        |         | 2  | 2953 | 0.98 | 1.00 | ± 0.10 | 1 |
|    |        |         | 1  | 3522 | 0.69 | 0.71 | ± 0.07 | 1 |
| 32 | 55.506 | -26.71  | 22 | 16   | 0.52 | 0.53 | ± 0.05 | 1 |
|    |        |         | 21 | 26   | 0.64 | 0.66 | ± 0.06 | 1 |
|    |        |         | 20 | 51   | 0.18 | 0.18 | ± 0.02 | 1 |
|    |        |         | 19 | 101  | 0.22 | 0.23 | ± 0.02 | 1 |
|    |        |         | 18 | 198  | 0.39 | 0.40 | ± 0.04 | 1 |

|    |        |         |    |      |      |      |        |   |
|----|--------|---------|----|------|------|------|--------|---|
|    |        |         | 17 | 298  | 0.49 | 0.50 | ± 0.05 | 1 |
|    |        |         | 16 | 376  | 1.99 | 2.04 | ± 0.20 | 3 |
|    |        |         | 15 | 446  | 0.84 | 0.86 | ± 0.08 | 1 |
|    |        |         | 14 | 596  | 1.43 | 1.47 | ± 0.14 | 3 |
|    |        |         | 13 | 691  | 2.02 | 2.07 | ± 0.20 | 3 |
|    |        |         | 12 | 793  | 0.82 | 0.84 | ± 0.08 | 1 |
|    |        |         | 11 | 990  | 0.71 | 0.73 | ± 0.07 | 1 |
|    |        |         | 10 | 1186 | 0.67 | 0.69 | ± 0.07 | 1 |
|    |        |         | 9  | 1383 | 1.08 | 1.11 | ± 0.11 | 2 |
|    |        |         | 8  | 1532 | 2.53 | 2.60 | ± 0.25 | 3 |
|    |        |         | 7  | 1680 | 1.11 | 1.14 | ± 0.11 | 2 |
|    |        |         | 6  | 1974 | 0.92 | 0.94 | ± 0.09 | 1 |
|    |        |         | 5  | 2218 | 0.92 | 0.94 | ± 0.09 | 1 |
|    |        |         | 4  | 2464 | 0.97 | 0.99 | ± 0.10 | 1 |
|    |        |         | 3  | 2758 | 1.02 | 1.05 | ± 0.10 | 1 |
|    |        |         | 2  | 2952 | 0.71 | 0.73 | ± 0.07 | 1 |
|    |        |         | 1  | 3217 | 0.63 | 0.65 | ± 0.06 | 1 |
| 34 | 57.004 | -27.879 | 22 | 11   | 2.23 | 2.28 | ± 0.16 | 3 |
|    |        |         | 21 | 29   | 0.54 | 0.55 | ± 0.04 | 1 |
|    |        |         | 20 | 46   | 0.28 | 0.29 | ± 0.02 | 1 |
|    |        |         | 19 | 60   | 0.53 | 0.54 | ± 0.04 | 1 |
|    |        |         | 18 | 100  | 0.55 | 0.56 | ± 0.04 | 1 |
|    |        |         | 17 | 199  | 0.85 | 0.87 | ± 0.06 | 1 |
|    |        |         | 16 | 298  | 1.06 | 1.09 | ± 0.07 | 1 |
|    |        |         | 15 | 377  | 1.01 | 1.04 | ± 0.07 | 1 |
|    |        |         | 14 | 445  | 1.13 | 1.16 | ± 0.08 | 1 |
|    |        |         | 13 | 595  | 0.83 | 0.85 | ± 0.06 | 1 |
|    |        |         | 12 | 693  | 1.01 | 1.04 | ± 0.07 | 1 |
|    |        |         | 11 | 841  | 1.15 | 1.18 | ± 0.08 | 1 |
|    |        |         | 9  | 1186 | 0.79 | 0.81 | ± 0.06 | 1 |
|    |        |         | 8  | 1383 | 0.87 | 0.89 | ± 0.06 | 1 |
|    |        |         | 7  | 1580 | 0.80 | 0.82 | ± 0.06 | 1 |
|    |        |         | 6  | 1777 | 0.88 | 0.90 | ± 0.06 | 1 |
|    |        |         | 4  | 2364 | 1.19 | 1.22 | ± 0.08 | 1 |
|    |        |         | 3  | 2561 | 0.91 | 0.93 | ± 0.06 | 1 |
|    |        |         | 2  | 2562 | 0.88 | 0.90 | ± 0.06 | 1 |



|    |        |         |    |      |      |      |        |   |
|----|--------|---------|----|------|------|------|--------|---|
|    |        |         | 1  | 2733 | 0.97 | 0.99 | ± 0.07 | 1 |
| 36 | 58.207 | -29.725 | 20 | 20   | 0.12 | 0.12 | ± 0.02 | 1 |
|    |        |         | 19 | 39   | 0.09 | 0.09 | ± 0.01 | 1 |
|    |        |         | 18 | 69   | 0.15 | 0.15 | ± 0.02 | 1 |
|    |        |         | 16 | 124  | 0.19 | 0.19 | ± 0.03 | 1 |
|    |        |         | 14 | 247  | 0.28 | 0.29 | ± 0.04 | 1 |
|    |        |         | 12 | 494  | 0.69 | 0.71 | ± 0.10 | 1 |
|    |        |         | 10 | 839  | 1.61 | 1.65 | ± 0.24 | 2 |
|    |        |         | 8  | 1204 | 1.15 | 1.18 | ± 0.17 | 1 |
|    |        |         | 6  | 1480 | 0.89 | 0.91 | ± 0.13 | 1 |
|    |        |         | 4  | 1775 | 1.23 | 1.26 | ± 0.18 | 1 |
|    |        |         | 2  | 2212 | 1.48 | 1.52 | ± 0.22 | 1 |
| 38 | 58.843 | -31.267 | 21 | 20   | 0.46 | 0.47 | ± 0.07 | 2 |
|    |        |         | 20 | 30   | 0.24 | 0.25 | ± 0.04 | 2 |
|    |        |         | 19 | 49   | 0.26 | 0.27 | ± 0.04 | 2 |
|    |        |         | 17 | 59   | 0.31 | 0.32 | ± 0.05 | 2 |
|    |        |         | 16 | 69   | 0.27 | 0.28 | ± 0.04 | 2 |
|    |        |         | 14 | 100  | 0.37 | 0.38 | ± 0.06 | 2 |
|    |        |         | 12 | 199  | 0.61 | 0.63 | ± 0.09 | 2 |
|    |        |         | 11 | 297  | 0.62 | 0.64 | ± 0.09 | 2 |
|    |        |         | 10 | 397  | 0.62 | 0.64 | ± 0.09 | 2 |
|    |        |         | 9  | 495  | 0.93 | 0.95 | ± 0.14 | 2 |
|    |        |         | 8  | 569  | 0.69 | 0.71 | ± 0.10 | 2 |
|    |        |         | 7  | 644  | 0.78 | 0.80 | ± 0.12 | 2 |
|    |        |         | 6  | 792  | 0.69 | 0.71 | ± 0.10 | 2 |
|    |        |         | 5  | 940  | 1.12 | 1.15 | ± 0.17 | 2 |
|    |        |         | 4  | 990  | 1.21 | 1.24 | ± 0.18 | 2 |
|    |        |         | 3  | 1149 | 1.08 | 1.11 | ± 0.16 | 2 |
|    |        |         | 2  | 1285 | 0.74 | 0.76 | ± 0.11 | 2 |
|    |        |         | 1  | 1337 | 1.23 | 1.26 | ± 0.19 | 2 |
| 40 | 59.102 | -33.828 | 22 | 20   | 0.38 | 0.39 | ± 0.05 | 1 |
|    |        |         | 20 | 37   | 0.56 | 0.57 | ± 0.08 | 1 |
|    |        |         | 18 | 68   | 0.66 | 0.68 | ± 0.09 | 1 |
|    |        |         | 16 | 149  | 0.84 | 0.86 | ± 0.12 | 1 |
|    |        |         | 14 | 346  | 0.89 | 0.91 | ± 0.12 | 1 |
|    |        |         | 12 | 593  | 0.95 | 0.97 | ± 0.13 | 1 |

|    |        |         |    |      |      |      |        |   |
|----|--------|---------|----|------|------|------|--------|---|
|    |        |         | 10 | 988  | 1.19 | 1.22 | ± 0.17 | 1 |
|    |        |         | 8  | 1282 | 3.30 | 3.38 | ± 0.46 | 3 |
|    |        |         | 6  | 1578 | 2.13 | 2.18 | ± 0.30 | 2 |
|    |        |         | 4  | 2069 | 1.37 | 1.40 | ± 0.19 | 1 |
|    |        |         | 2  | 2273 | 1.25 | 1.28 | ± 0.17 | 1 |
| 42 | 59.363 | -36.397 | 22 | 20   | 0.35 | 0.36 | ± 0.05 | 1 |
|    |        |         | 21 | 35   | 0.69 | 0.71 | ± 0.10 | 3 |
|    |        |         | 20 | 50   | 0.37 | 0.38 | ± 0.05 | 1 |
|    |        |         | 19 | 70   | 0.57 | 0.58 | ± 0.08 | 1 |
|    |        |         | 18 | 99   | 0.97 | 0.99 | ± 0.14 | 1 |
|    |        |         | 17 | 199  | 0.95 | 0.97 | ± 0.13 | 1 |
|    |        |         | 16 | 297  | 0.71 | 0.73 | ± 0.10 | 1 |
|    |        |         | 15 | 397  | 0.85 | 0.87 | ± 0.12 | 1 |
|    |        |         | 14 | 495  | 0.78 | 0.80 | ± 0.11 | 1 |
|    |        |         | 13 | 693  | 0.84 | 0.86 | ± 0.12 | 1 |
|    |        |         | 12 | 890  | 1.06 | 1.09 | ± 0.15 | 1 |
|    |        |         | 11 | 1038 | 0.82 | 0.84 | ± 0.11 | 1 |
|    |        |         | 10 | 1186 | 0.91 | 0.93 | ± 0.13 | 1 |
|    |        |         | 9  | 1383 | 1.69 | 1.73 | ± 0.24 | 3 |
|    |        |         | 8  | 1580 | 2.39 | 2.45 | ± 0.34 | 3 |
|    |        |         | 7  | 1777 | 1.09 | 1.12 | ± 0.15 | 1 |
|    |        |         | 6  | 1973 | 1.93 | 1.98 | ± 0.27 | 3 |
|    |        |         | 5  | 2217 | 1.27 | 1.30 | ± 0.18 | 1 |
|    |        |         | 4  | 2462 | 1.44 | 1.48 | ± 0.20 | 1 |
|    |        |         | 3  | 2854 | 1.02 | 1.05 | ± 0.14 | 1 |
|    |        |         | 2  | 3048 | 1.64 | 1.68 | ± 0.23 | 1 |
|    |        |         | 1  | 3078 | 0.96 | 0.98 | ± 0.13 | 1 |
| 44 | 59.623 | -38.954 | 22 | 21   | 1.33 | 1.37 | ± 0.13 | 3 |
|    |        |         | 21 | 31   | 0.54 | 0.55 | ± 0.05 | 1 |
|    |        |         | 20 | 40   | 0.50 | 0.51 | ± 0.05 | 1 |
|    |        |         | 19 | 50   | 1.01 | 1.04 | ± 0.10 | 1 |
|    |        |         | 18 | 100  | 1.25 | 1.28 | ± 0.12 | 2 |
|    |        |         | 17 | 198  | 0.80 | 0.82 | ± 0.08 | 1 |
|    |        |         | 16 | 299  | 0.65 | 0.67 | ± 0.06 | 1 |
|    |        |         | 15 | 496  | 2.08 | 2.13 | ± 0.21 | 1 |
|    |        |         | 14 | 693  | 0.98 | 1.00 | ± 0.10 | 1 |

|    |        |         |    |      |      |      |        |   |
|----|--------|---------|----|------|------|------|--------|---|
|    |        |         | 13 | 891  | 1.23 | 1.26 | ± 0.12 | 1 |
|    |        |         | 12 | 990  | 0.73 | 0.75 | ± 0.07 | 1 |
|    |        |         | 11 | 1087 | 0.96 | 0.98 | ± 0.10 | 1 |
|    |        |         | 10 | 1236 | 1.14 | 1.17 | ± 0.11 | 1 |
|    |        |         | 9  | 1382 | 1.14 | 1.17 | ± 0.11 | 1 |
|    |        |         | 8  | 1581 | 1.25 | 1.28 | ± 0.12 | 1 |
|    |        |         | 7  | 1776 | 1.20 | 1.23 | ± 0.12 | 1 |
|    |        |         | 6  | 1972 | 1.05 | 1.08 | ± 0.11 | 1 |
|    |        |         | 5  | 2218 | 1.70 | 1.74 | ± 0.17 | 2 |
|    |        |         | 4  | 2560 | 2.45 | 2.51 | ± 0.25 | 2 |
|    |        |         | 3  | 2754 | 1.99 | 2.04 | ± 0.20 | 2 |
|    |        |         | 2  | 2854 | 1.14 | 1.17 | ± 0.11 | 1 |
|    |        |         | 1  | 2915 | 1.34 | 1.37 | ± 0.13 | 2 |
| 49 | 59.773 | -41.297 | 22 | 19   | 0.25 | 0.26 | ± 0.02 | 1 |
|    |        |         | 21 | 40   | 0.33 | 0.34 | ± 0.02 | 1 |
|    |        |         | 20 | 61   | 0.42 | 0.43 | ± 0.03 | 1 |
|    |        |         | 19 | 80   | 0.45 | 0.46 | ± 0.03 | 1 |
|    |        |         | 18 | 101  | 0.45 | 0.46 | ± 0.03 | 1 |
|    |        |         | 17 | 198  | 0.89 | 0.91 | ± 0.06 | 1 |
|    |        |         | 16 | 297  | 0.96 | 0.98 | ± 0.07 | 1 |
|    |        |         | 15 | 396  | 1.18 | 1.21 | ± 0.08 | 1 |
|    |        |         | 14 | 544  | 1.75 | 1.80 | ± 0.12 | 3 |
|    |        |         | 13 | 593  | 1.02 | 1.05 | ± 0.07 | 1 |
|    |        |         | 12 | 693  | 0.98 | 1.00 | ± 0.07 | 1 |
|    |        |         | 11 | 792  | 1.17 | 1.20 | ± 0.08 | 1 |
|    |        |         | 10 | 891  | 0.97 | 0.99 | ± 0.07 | 1 |
|    |        |         | 9  | 989  | 1.15 | 1.18 | ± 0.08 | 1 |
|    |        |         | 8  | 1088 | 1.78 | 1.82 | ± 0.12 | 3 |
|    |        |         | 7  | 1235 | 1.25 | 1.28 | ± 0.09 | 1 |
|    |        |         | 6  | 1482 | 1.32 | 1.35 | ± 0.09 | 1 |
|    |        |         | 5  | 1629 | 1.53 | 1.57 | ± 0.11 | 1 |
|    |        |         | 4  | 1776 | 1.12 | 1.15 | ± 0.08 | 1 |
|    |        |         | 3  | 1873 | 1.35 | 1.38 | ± 0.09 | 1 |
|    |        |         | 2  | 1972 | 1.26 | 1.29 | ± 0.09 | 1 |
|    |        |         | 1  | 2022 | 1.11 | 1.14 | ± 0.08 | 1 |
| 53 | 59.902 | -43.015 | 16 | 55   | 1.17 | 1.20 | ± 0.12 | 1 |

|           |        |         |    |      |      |      |        |   |
|-----------|--------|---------|----|------|------|------|--------|---|
|           |        |         | 12 | 70   | 1.43 | 1.47 | ± 0.14 | 1 |
|           |        |         | 8  | 100  | 1.93 | 1.98 | ± 0.19 | 1 |
|           |        |         | 4  | 129  | 1.85 | 1.90 | ± 0.19 | 1 |
|           |        |         | 1  | 164  | 2.99 | 3.06 | ± 0.30 | 1 |
| <b>56</b> | 59.823 | -42.399 | 22 | 20   | 0.85 | 0.87 | ± 0.06 | 1 |
|           |        |         | 20 | 40   | 0.50 | 0.51 | ± 0.03 | 1 |
|           |        |         | 16 | 60   | 0.55 | 0.56 | ± 0.04 | 1 |
|           |        |         | 14 | 119  | 1.84 | 1.89 | ± 0.13 | 3 |
|           |        |         | 10 | 168  | 0.29 | 0.30 | ± 0.02 | 1 |
|           |        |         | 6  | 246  | 0.33 | 0.34 | ± 0.02 | 1 |
|           |        |         | 2  | 296  | 0.42 | 0.43 | ± 0.03 | 1 |
| 60        | 59.799 | -42.004 | 22 | 19   | 0.24 | 0.25 | ± 0.02 | 1 |
|           |        |         | 21 | 28   | 0.22 | 0.23 | ± 0.02 | 1 |
|           |        |         | 20 | 38   | 0.84 | 0.86 | ± 0.08 | 3 |
|           |        |         | 19 | 59   | 0.36 | 0.37 | ± 0.04 | 1 |
|           |        |         | 18 | 77   | 0.39 | 0.40 | ± 0.04 | 1 |
|           |        |         | 17 | 99   | 0.40 | 0.41 | ± 0.04 | 1 |
|           |        |         | 16 | 149  | 0.45 | 0.46 | ± 0.05 | 1 |
|           |        |         | 15 | 199  | 0.71 | 0.73 | ± 0.07 | 1 |
|           |        |         | 14 | 248  | 0.69 | 0.71 | ± 0.07 | 1 |
|           |        |         | 13 | 297  | 0.62 | 0.64 | ± 0.06 | 1 |
|           |        |         | 12 | 345  | 0.79 | 0.81 | ± 0.08 | 1 |
|           |        |         | 11 | 445  | 0.77 | 0.79 | ± 0.08 | 1 |
|           |        |         | 10 | 543  | 0.73 | 0.75 | ± 0.07 | 1 |
|           |        |         | 9  | 642  | 0.77 | 0.79 | ± 0.08 | 1 |
|           |        |         | 8  | 741  | 0.86 | 0.88 | ± 0.09 | 1 |
|           |        |         | 6  | 938  | 1.02 | 1.05 | ± 0.10 | 1 |
|           |        |         | 5  | 1137 | 1.09 | 1.12 | ± 0.11 | 1 |
|           |        |         | 4  | 1284 | 1.04 | 1.07 | ± 0.10 | 1 |
|           |        |         | 3  | 1480 | 0.94 | 0.96 | ± 0.09 | 1 |
|           |        |         | 2  | 1625 | 1.02 | 1.05 | ± 0.10 | 1 |
|           |        |         | 1  | 1714 | 0.98 | 1.00 | ± 0.10 | 1 |
| <b>61</b> | 59.753 | -45.112 | 12 | 23   | 0.77 | 0.79 | ± 0.12 | 1 |
|           |        |         | 9  | 50   | 1.21 | 1.24 | ± 0.18 | 1 |
|           |        |         | 7  | 70   | 0.56 | 0.57 | ± 0.08 | 1 |
|           |        |         | 5  | 100  | 1.72 | 1.76 | ± 0.26 | 1 |

|    |        |         |    |      |      |      |        |   |
|----|--------|---------|----|------|------|------|--------|---|
|    |        |         | 3  | 120  | 2.21 | 2.27 | ± 0.33 | 1 |
|    |        |         | 1  | 137  | 1.73 | 1.77 | ± 0.26 | 1 |
| 63 | 59.434 | -45.666 | 12 | 20   | 0.39 | 0.40 | ± 0.03 | 1 |
|    |        |         | 10 | 70   | 1.39 | 1.43 | ± 0.10 | 3 |
|    |        |         | 9  | 99   | 0.68 | 0.70 | ± 0.05 | 1 |
|    |        |         | 8  | 198  | 0.64 | 0.66 | ± 0.04 | 1 |
|    |        |         | 7  | 297  | 0.61 | 0.63 | ± 0.04 | 1 |
|    |        |         | 6  | 396  | 0.69 | 0.71 | ± 0.05 | 1 |
|    |        |         | 5  | 495  | 0.64 | 0.66 | ± 0.05 | 1 |
|    |        |         | 4  | 840  | 0.65 | 0.67 | ± 0.05 | 1 |
|    |        |         | 3  | 1083 | 0.71 | 0.73 | ± 0.05 | 1 |
|    |        |         | 2  | 1284 | 0.85 | 0.87 | ± 0.06 | 1 |
|    |        |         | 1  | 1537 | 0.78 | 0.80 | ± 0.05 | 1 |
| 64 | 59.068 | -46.083 | 22 | 15   | 0.30 | 0.31 | ± 0.04 | 1 |
|    |        |         | 21 | 25   | 0.22 | 0.23 | ± 0.03 | 1 |
|    |        |         | 20 | 35   | 0.26 | 0.27 | ± 0.03 | 1 |
|    |        |         | 19 | 50   | 0.40 | 0.41 | ± 0.05 | 1 |
|    |        |         | 18 | 100  | 0.70 | 0.72 | ± 0.08 | 1 |
|    |        |         | 17 | 150  | 0.78 | 0.80 | ± 0.09 | 1 |
|    |        |         | 16 | 198  | 0.79 | 0.81 | ± 0.09 | 1 |
|    |        |         | 15 | 317  | 0.89 | 0.91 | ± 0.11 | 1 |
|    |        |         | 14 | 397  | 0.85 | 0.87 | ± 0.10 | 1 |
|    |        |         | 13 | 496  | 0.79 | 0.81 | ± 0.09 | 1 |
|    |        |         | 12 | 693  | 0.81 | 0.83 | ± 0.10 | 1 |
|    |        |         | 11 | 792  | 0.75 | 0.77 | ± 0.09 | 1 |
|    |        |         | 10 | 890  | 0.95 | 0.97 | ± 0.11 | 1 |
|    |        |         | 9  | 1038 | 1.03 | 1.06 | ± 0.12 | 1 |
|    |        |         | 8  | 1137 | 0.96 | 0.98 | ± 0.11 | 1 |
|    |        |         | 7  | 1383 | 0.93 | 0.95 | ± 0.11 | 1 |
|    |        |         | 6  | 1580 | 0.99 | 1.01 | ± 0.12 | 1 |
|    |        |         | 5  | 1776 | 0.92 | 0.94 | ± 0.11 | 1 |
|    |        |         | 4  | 1973 | 2.10 | 2.16 | ± 0.25 | 3 |
|    |        |         | 3  | 2120 | 0.98 | 1.00 | ± 0.12 | 1 |
|    |        |         | 2  | 2365 | 0.99 | 1.01 | ± 0.12 | 1 |
|    |        |         | 1  | 2464 | 1.05 | 1.08 | ± 0.13 | 1 |
| 68 | 56.916 | -47.422 | 13 | 20   | 0.21 | 0.22 | ± 0.01 | 1 |

|    |        |         |    |      |      |      |        |   |
|----|--------|---------|----|------|------|------|--------|---|
|    |        |         | 12 | 29   | 0.11 | 0.11 | ± 0.01 | 1 |
|    |        |         | 10 | 35   | 0.26 | 0.27 | ± 0.02 | 1 |
|    |        |         | 9  | 50   | 0.30 | 0.31 | ± 0.02 | 1 |
|    |        |         | 8  | 100  | 0.73 | 0.75 | ± 0.05 | 1 |
|    |        |         | 7  | 345  | 0.62 | 0.64 | ± 0.04 | 1 |
|    |        |         | 6  | 891  | 0.69 | 0.71 | ± 0.05 | 1 |
|    |        |         | 5  | 1382 | 0.61 | 0.63 | ± 0.04 | 1 |
|    |        |         | 4  | 1677 | 0.71 | 0.73 | ± 0.05 | 1 |
|    |        |         | 3  | 2463 | 0.85 | 0.87 | ± 0.06 | 1 |
|    |        |         | 2  | 3342 | 0.68 | 0.70 | ± 0.05 | 1 |
|    |        |         | 1  | 3574 | 0.68 | 0.70 | ± 0.05 | 1 |
| 69 | 55.842 | -48.093 | 22 | 14   | 0.23 | 0.24 | ± 0.02 | 1 |
|    |        |         | 21 | 26   | 0.18 | 0.18 | ± 0.01 | 1 |
|    |        |         | 20 | 30   | 0.22 | 0.23 | ± 0.02 | 1 |
|    |        |         | 19 | 40   | 0.35 | 0.36 | ± 0.02 | 1 |
|    |        |         | 18 | 60   | 0.64 | 0.65 | ± 0.04 | 3 |
|    |        |         | 17 | 90   | 0.47 | 0.48 | ± 0.03 | 1 |
|    |        |         | 16 | 128  | 0.62 | 0.64 | ± 0.04 | 1 |
|    |        |         | 15 | 178  | 0.64 | 0.66 | ± 0.04 | 1 |
|    |        |         | 14 | 495  | 0.86 | 0.88 | ± 0.06 | 1 |
|    |        |         | 13 | 792  | 0.74 | 0.76 | ± 0.05 | 1 |
|    |        |         | 12 | 1087 | 1.10 | 1.13 | ± 0.08 | 2 |
|    |        |         | 10 | 1381 | 0.79 | 0.81 | ± 0.06 | 1 |
|    |        |         | 9  | 1580 | 0.90 | 0.92 | ± 0.06 | 1 |
|    |        |         | 8  | 1776 | 0.84 | 0.86 | ± 0.06 | 1 |
|    |        |         | 7  | 2071 | 0.78 | 0.80 | ± 0.05 | 1 |
|    |        |         | 6  | 2365 | 0.95 | 0.97 | ± 0.07 | 1 |
|    |        |         | 5  | 2757 | 0.95 | 0.97 | ± 0.07 | 1 |
|    |        |         | 4  | 3196 | 0.76 | 0.78 | ± 0.05 | 1 |
|    |        |         | 3  | 3440 | 0.60 | 0.62 | ± 0.04 | 1 |
|    |        |         | 2  | 3635 | 0.63 | 0.65 | ± 0.04 | 1 |
|    |        |         | 1  | 3669 | 0.61 | 0.63 | ± 0.04 | 1 |
| 71 | 53.692 | -49.433 | 22 | 20   | 0.28 | 0.29 | ± 0.02 | 1 |
|    |        |         | 21 | 30   | 0.34 | 0.35 | ± 0.02 | 1 |
|    |        |         | 20 | 40   | 0.53 | 0.54 | ± 0.04 | 1 |
|    |        |         | 19 | 50   | 0.22 | 0.23 | ± 0.02 | 1 |

|    |    |       |    |      |      |      |        |   |
|----|----|-------|----|------|------|------|--------|---|
|    |    |       | 18 | 60   | 0.33 | 0.34 | ± 0.02 | 1 |
|    |    |       | 17 | 100  | 0.61 | 0.63 | ± 0.04 | 1 |
|    |    |       | 16 | 149  | 0.64 | 0.66 | ± 0.04 | 1 |
|    |    |       | 15 | 248  | 0.73 | 0.75 | ± 0.05 | 1 |
|    |    |       | 14 | 347  | 0.79 | 0.81 | ± 0.05 | 1 |
|    |    |       | 13 | 496  | 0.81 | 0.83 | ± 0.06 | 1 |
|    |    |       | 12 | 792  | 0.67 | 0.69 | ± 0.05 | 1 |
|    |    |       | 10 | 1187 | 0.81 | 0.83 | ± 0.06 | 1 |
|    |    |       | 9  | 1383 | 0.84 | 0.86 | ± 0.06 | 1 |
|    |    |       | 8  | 1678 | 2.17 | 2.23 | ± 0.15 | 3 |
|    |    |       | 7  | 1974 | 0.72 | 0.74 | ± 0.05 | 1 |
|    |    |       | 6  | 2366 | 0.78 | 0.80 | ± 0.05 | 1 |
|    |    |       | 5  | 2709 | 1.02 | 1.04 | ± 0.07 | 3 |
|    |    |       | 4  | 2952 | 0.83 | 0.85 | ± 0.06 | 1 |
|    |    |       | 2  | 3440 | 0.68 | 0.70 | ± 0.05 | 1 |
|    |    |       | 1  | 3689 | 0.73 | 0.75 | ± 0.05 | 1 |
| 77 | 53 | -51.1 | 22 | 15   | 0.28 | 0.29 | ± 0.02 | 1 |
|    |    |       | 21 | 30   | 0.26 | 0.27 | ± 0.02 | 1 |
|    |    |       | 20 | 40   | 0.31 | 0.32 | ± 0.02 | 1 |
|    |    |       | 19 | 60   | 0.55 | 0.56 | ± 0.04 | 1 |
|    |    |       | 18 | 80   | 0.56 | 0.57 | ± 0.04 | 1 |
|    |    |       | 17 | 100  | 0.77 | 0.79 | ± 0.05 | 1 |
|    |    |       | 16 | 149  | 0.90 | 0.92 | ± 0.06 | 1 |
|    |    |       | 15 | 396  | 1.21 | 1.24 | ± 0.09 | 2 |
|    |    |       | 14 | 693  | 0.96 | 0.98 | ± 0.07 | 1 |
|    |    |       | 13 | 989  | 0.83 | 0.85 | ± 0.06 | 1 |
|    |    |       | 12 | 1088 | 0.87 | 0.89 | ± 0.06 | 1 |
|    |    |       | 10 | 1186 | 0.96 | 0.98 | ± 0.07 | 1 |
|    |    |       | 9  | 1285 | 0.95 | 0.97 | ± 0.07 | 1 |
|    |    |       | 8  | 1482 | 0.90 | 0.92 | ± 0.06 | 1 |
|    |    |       | 7  | 1679 | 0.95 | 0.97 | ± 0.07 | 1 |
|    |    |       | 6  | 1875 | 0.92 | 0.94 | ± 0.06 | 1 |
|    |    |       | 5  | 2072 | 1.01 | 1.04 | ± 0.07 | 1 |
|    |    |       | 4  | 2366 | 0.94 | 0.96 | ± 0.07 | 1 |
|    |    |       | 2  | 2415 | 0.93 | 0.95 | ± 0.07 | 1 |
|    |    |       | 1  | 2506 | 0.88 | 0.90 | ± 0.06 | 1 |

|           |        |         |    |     |      |      |        |   |
|-----------|--------|---------|----|-----|------|------|--------|---|
| <b>78</b> | 51.989 | -53.817 | 12 | 12  | 0.77 | 0.79 | ± 0.05 | 1 |
|           |        |         | 9  | 36  | 1.15 | 1.18 | ± 0.08 | 1 |
|           |        |         | 7  | 139 | 2.36 | 2.42 | ± 0.17 | 1 |
|           |        |         | 5  | 248 | 4.02 | 4.12 | ± 0.28 | 1 |
|           |        |         | 4  | 288 | 3.23 | 3.31 | ± 0.23 | 1 |
|           |        |         | 1  | 368 | 7.64 | 7.83 | ± 0.53 | 1 |

---
