# Supplementary material for: Dissolved iron in the North Atlantic Ocean and Labrador Sea along the GEOVIDE section (GEOTRACES section GA01)
Source: Copernicus journal article supplement (doi:10.5194/bg-2018-147), 2018-04-04
Supplement: Supplementary file [file bg-2018-147-AC5-supplement.pdf]

Supplementary material

Figure S1: Section plot of Total Chlorophyll-a (TChl-a) concentrations ( $\text{mg m}^{-3}$ ) measured for the GA01 voyage. The black contour lines highlight the TChl-a concentrations and the white contour lines highlight the dissolved iron (DFe) concentrations. The red dashed line indicates the depth of the Surface Mixed Layer (SML) (see text for details). (Ocean Data View (ODV) software, version 4.7.6, R. Schlitzer, <http://odv.awi.de>, 2016).

5

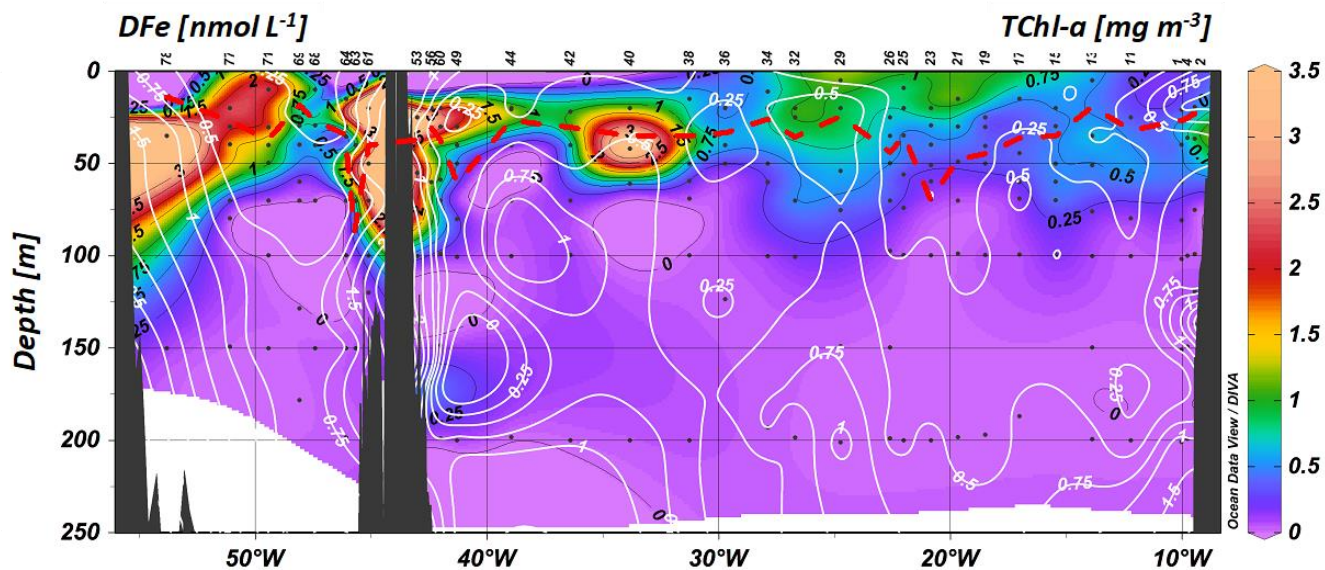

10

Figure S2: Mean profiles of dissolved iron (Fe) along the North Atlantic section in the West European Basin (purple), Iceland Basin (blue), Irminger Sea (green) and Labrador Sea (red) over the depth intervals: 0-100 m, 100-250 m, 250-500 m, 500-1000 m, 1000-1500 m, 1500-2000 m, 2000-3000 m, 3000-4000 m, 4000-5500 m without considering stations located above the continental plateau.

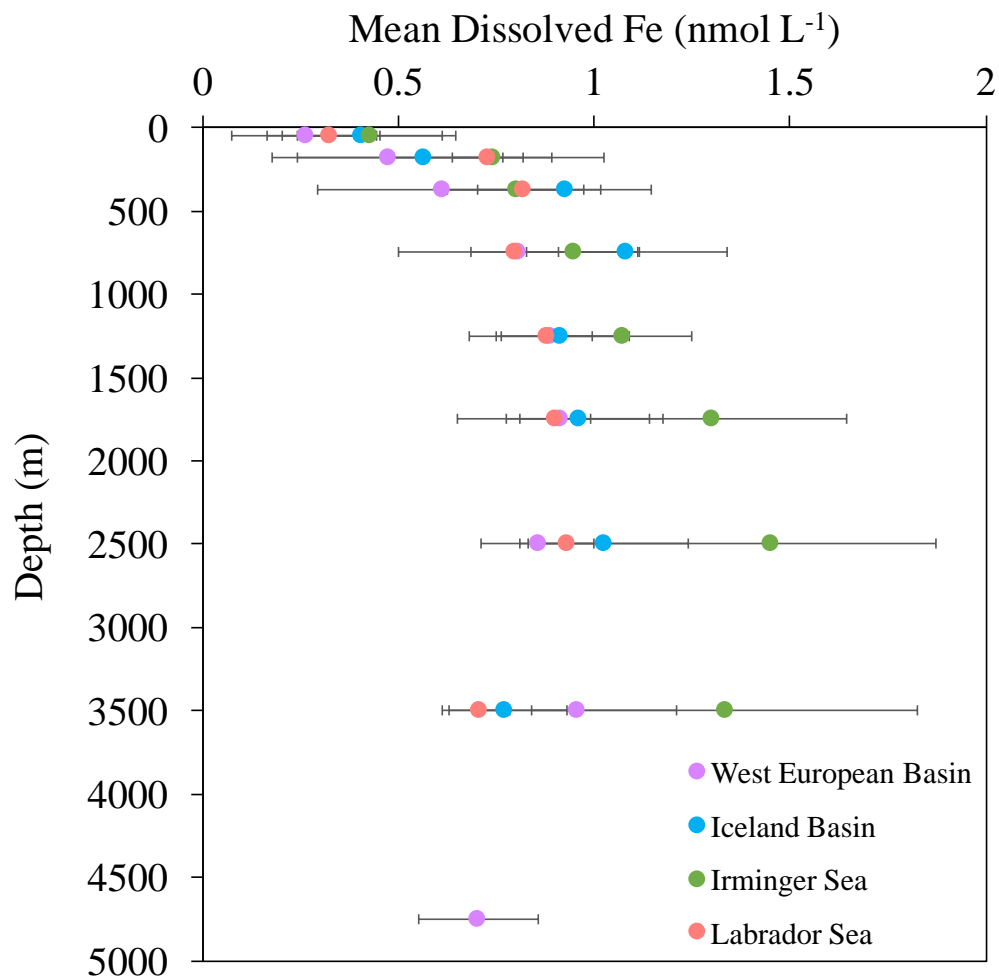

Figure S3: Box and whisker plot of dissolved iron (DFe) in  $\text{nmol L}^{-1}$  per water mass and basin. Color coding representing from West to East: the Labrador Sea (red), the Irminger Sea (green), the Iceland Basin (blue) and the West European Basin (purple). Note that stations 1 and 17 were not considered in this plot. SAIW: Sub-Arctic Intermediate Water, ENACW: East North Atlantic Central Water, IrSPMW: Irminger Sub-Polar Mode Water, IcSPMW: Iceland Sub-Polar Mode Water, MOW: Mediterranean Overflow Water, LSW: Labrador Sea Water, ISOW: Iceland-Scotland Overflow Water, DSOW: Denmark Strait Overflow Water, NEADW: North East Atlantic Deep Water.

5

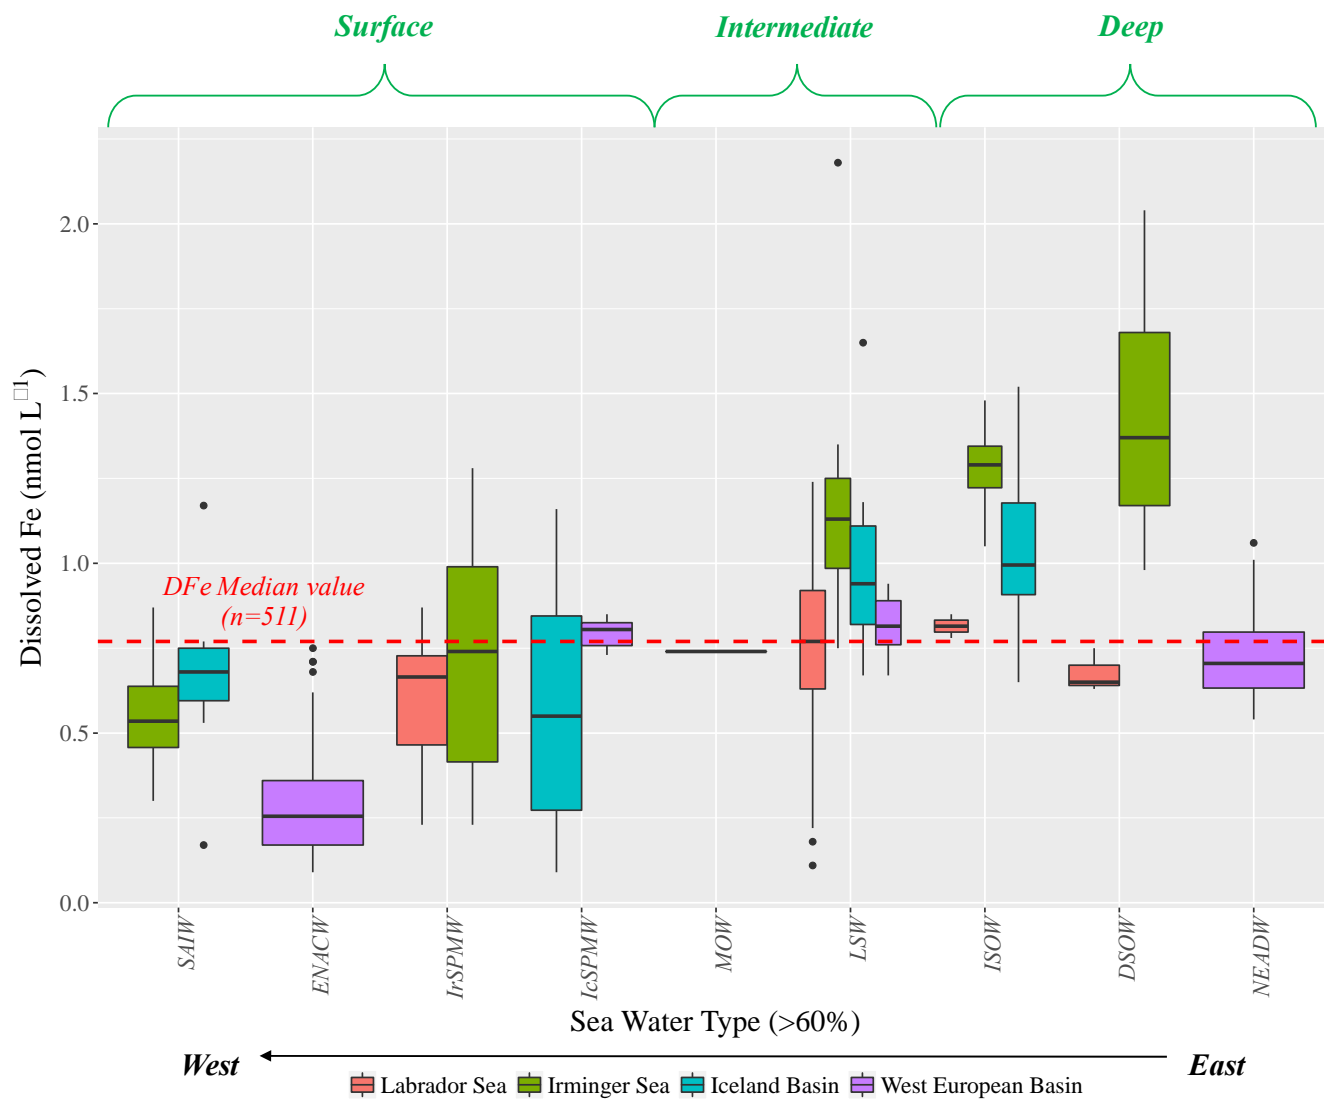

5 Figure S4: Surface layer of DFe concentrations, new measurements are shown in red dots (GEOVIDE voyage), while previous studies are displayed in black (Achterberg et al., 2018; Bergquist et al., 2007; Blain et al., 2004; Boye et al., 2006, 2003; de Jong et al., 2007; Gledhill et al., 1998; Hatta et al., 2015; Klunder et al., 2012; Laës et al., 2003; Martin et al., 1993; Measures et al., 2008; Mills et al., 2008; Mohamed et al., 2011; Nédélec et al., 2007; Nielsdóttir et al., 2009; Pohl et al., 2011; Rijkenberg et al., 2014; Sarthou et al., 2007, 2003; Sedwick et al., 2005; Ussher et al., 2013; Witter and Luther III, 1998; Wu and Boyle, 2002; Wu and Luther III, 1996, 1994; Wu et al., 2001).

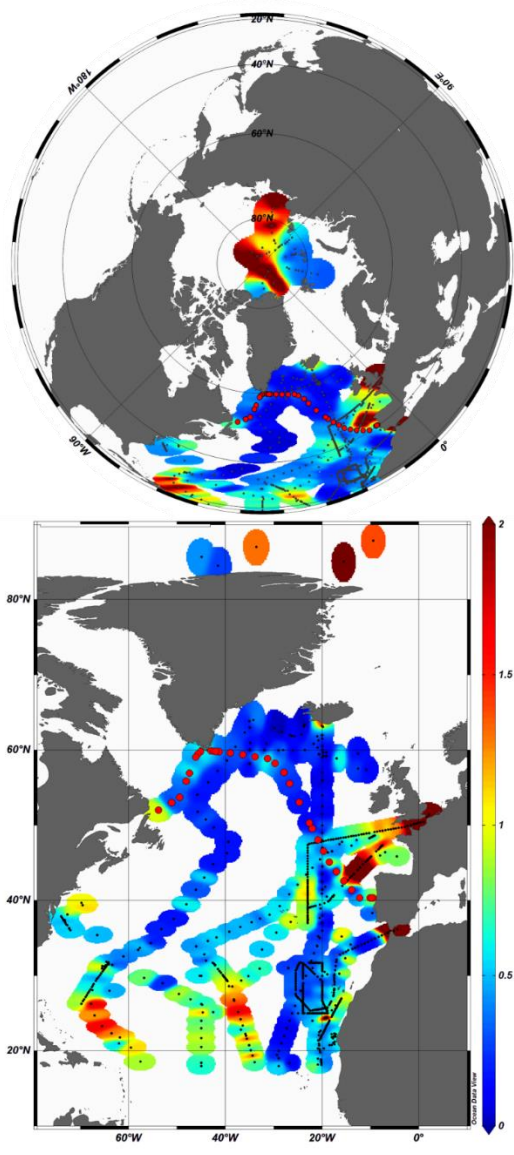

5 **Figure S5: A) Plot of dissolved iron (DFe) concentrations as a function of the percentage of Polar Intermediate Water (PIW) contribution for open-ocean stations (stations 44, 49, 60, 63, 68, 69, 71 and 77). Station 44 highlighted in green and dashed-line representing the linear regression line between DFe concentrations and percentage of PIW contribution for all stations except station 44. B) Plot of dissolved (DFe, black dots) and particulate iron (PFe, open dots, Gourain et al., in prep.) for station 44 (from 2220 m depth to the bottom) as a function of the percentage of mixing between Iceland-Scotland Overflow Water (ISOW) as opposed to Polar Intermediate Water (PIW) and Denmark Strait Overflow Water (DSOW) (Garcia-Ibanez et al., 2015) with polynomial (DFe) and exponential (PFe) regression equations.**

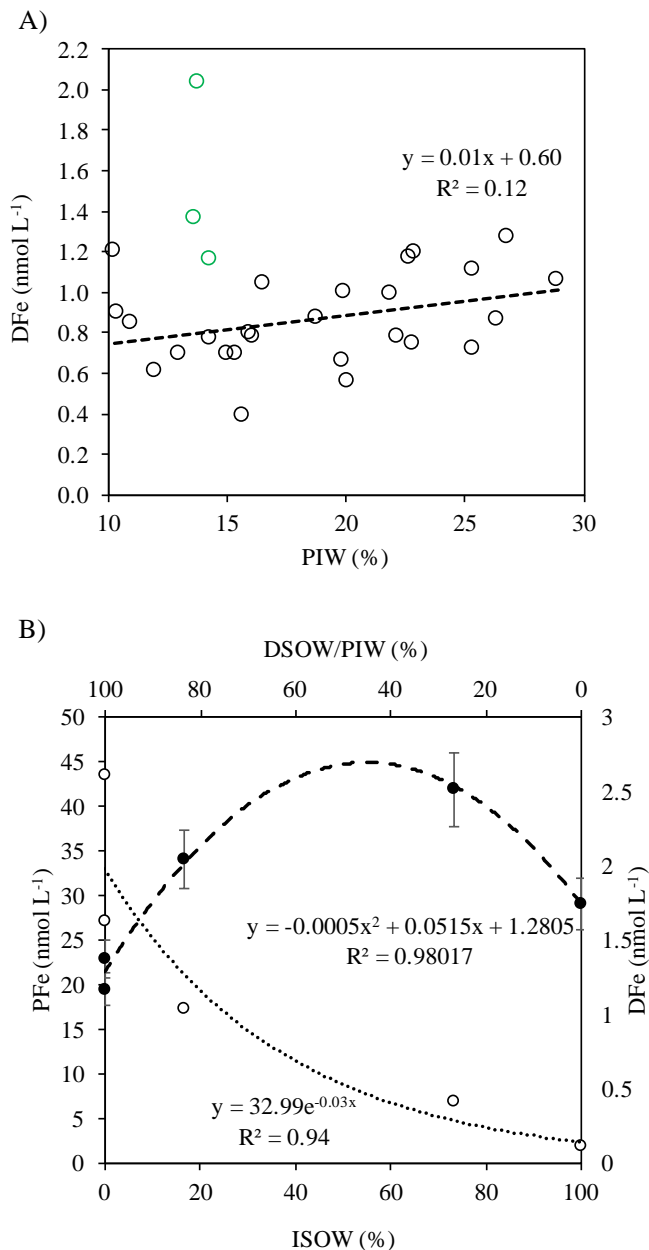

5 **Figure S6: Plots of the first two dimensions of a Principal Component Analysis (PCA) performed on A) the following variables: Apparent Oxygen Utilization (AOU), dissolved aluminium (DAI, Menzel Barraqueta et al., 2018), particulate iron, aluminum and manganese oxides (PFe, PAI and MnO<sub>2</sub>, Gourain et al., in prep.) and B) for samples which presented a transmissometry lower than 99% and below 500 m depth to avoid surface processes. Note that the color coding corresponds to different water masses (contribution >60% of the whole water mass pool) with the Denmark Strait Overflow Water (DSOW) in grey, the East North Atlantic Central Water (ENACW) in yellow, the Irminger Sub-Polar Mode Water (IrSPMW) in blue, the Iceland-Scotland Overflow Water (ISOW) in green, the Labrador Sea Water (LSW) in red, the Mediterranean Overflow Water (MOW) in orange, the North East Atlantic Deep Water (NEADW) in pink and mixing of multiple water masses (NA) in white. Plots of dissolved iron (DFe) plotted as a function of distance height above the seafloor for C) the first dimension of the PCA and D) the second dimension of the PCA. Note that positive and negative values are represented in blue and red, respectively and that dot size are function of the particulate iron and manganese oxide ratios (PFe:MnO<sub>2</sub>, mol mol<sup>-1</sup>).**

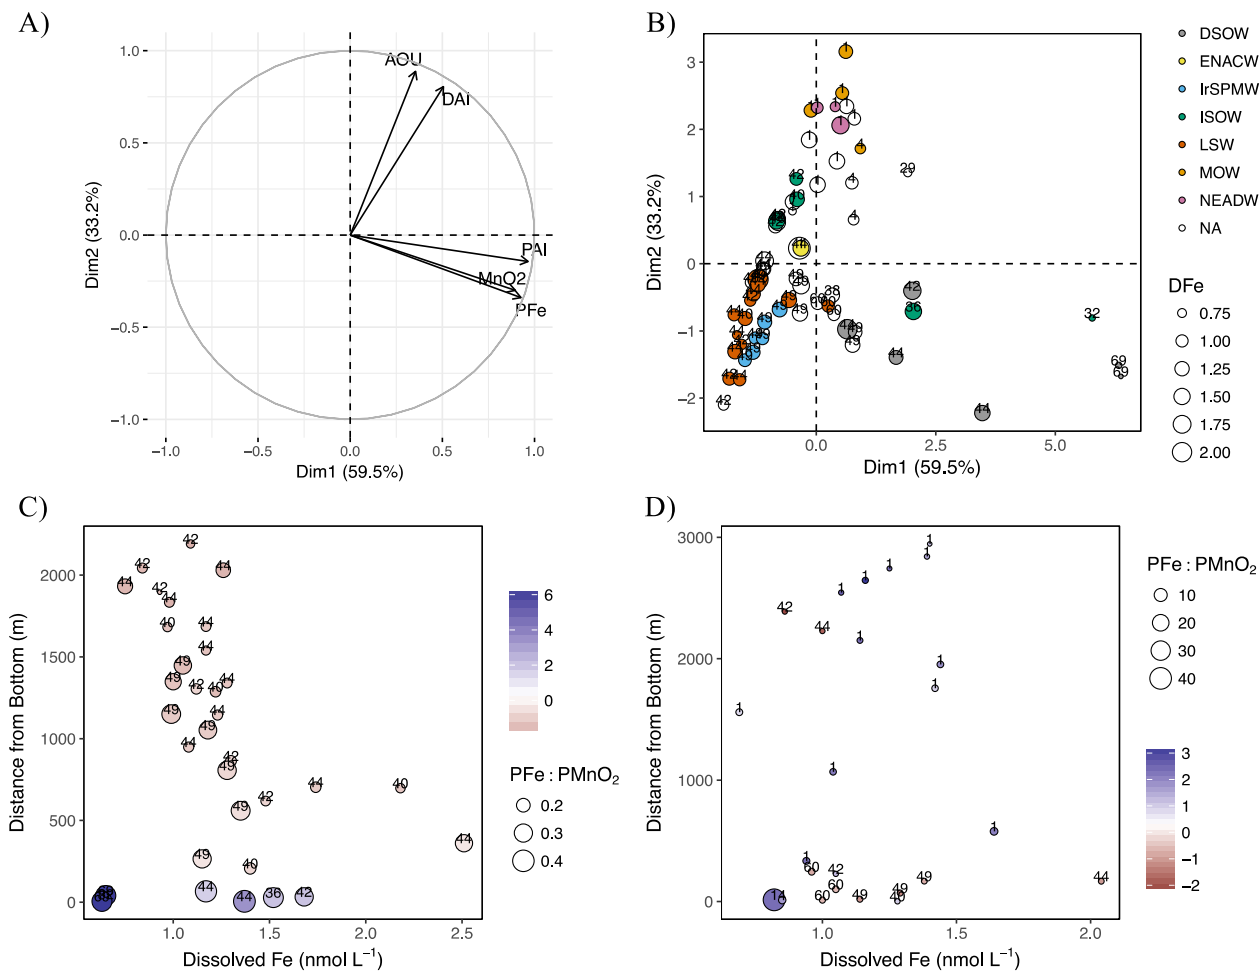

5 Figure S7: Vertical profiles of the  $\text{DFe:NO}_3^-$  ratio over the upper 200 m of the water column along the GEOVIDE section. Profiles from the West European Basin are plotted in black, from the Iceland Basin in grey, from the Irminger Sea in green and from the Labrador Sea in red. Stations located above the continental Plateau (stations 1, 2 and 4 from the Iberian Margin; stations 53 and 61 from the Greenland shelf; station 78 from the Newfoundland Margin) are represented with dotted lines. The vertical dashed lines (light blue) indicate lower and upper limits of phytoplankton cellular  $\text{DFe:NO}_3^-$  ratios under Fe replete conditions Ho et al., 2003; Sunda and Huntsman, 1995; Twining et al., 2004.

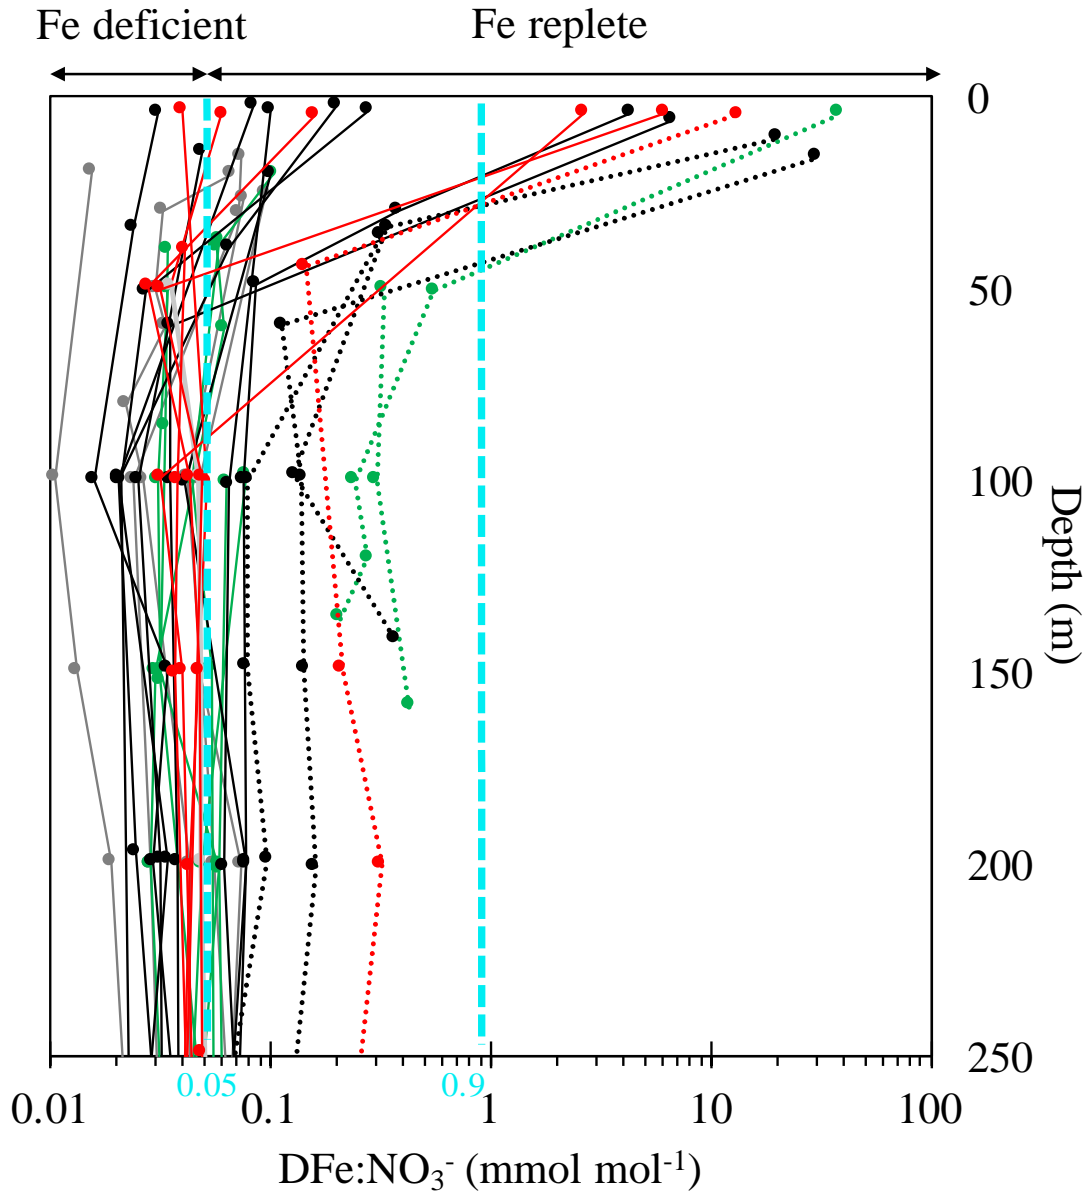

Figure S8: Surface map of the  $DFe:NO_3^-$  ratios along the GEOVIDE section.

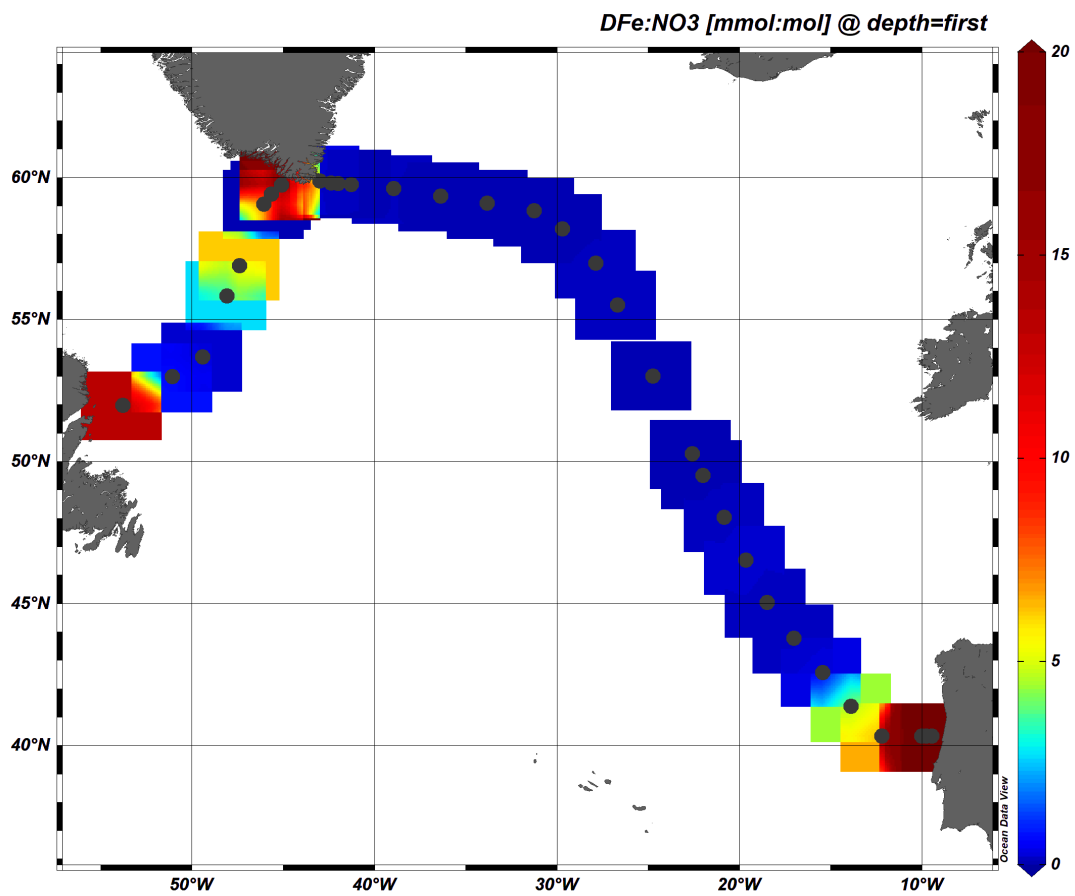



Figure S9: Section plot of the  $Fe^*$  tracer in the North Atlantic Ocean with a remineralization rate ( $R_{Fe:N}$ ) of  $0.05 \text{ mmol mol}^{-1}$  from 100 m depth to bottom waters. A contour line of 0 separates areas of negative  $Fe^*$  from areas with positive  $Fe^*$ . Positive values of  $Fe^*$  imply there is enough iron to support complete consumption of  $NO_3^-$  when this water is brought to surface, and negative  $Fe^*$  imply a deficit. See text for details.

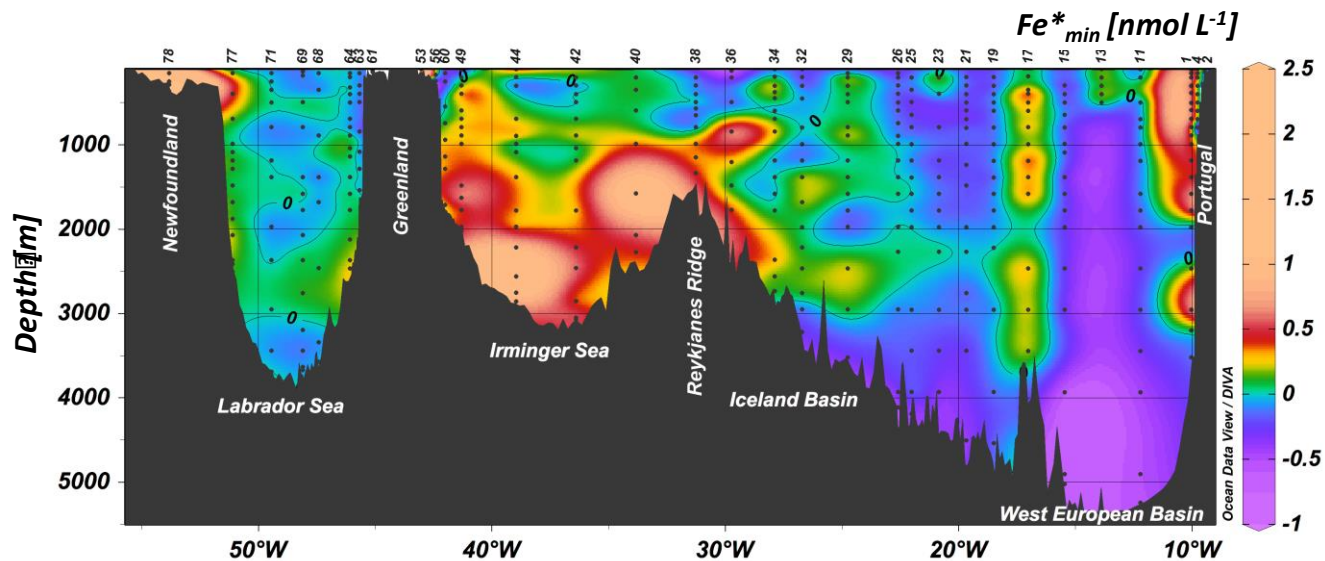

Figure S10: Box and whisker plot of  $\text{Fe}^*$  in units of  $\text{nmol L}^{-1}$  as determined per water mass and basin with a Fe:N uptake rate of 0.05. Color coding representing from West to East, the Labrador Sea (red), the Irminger Sea (green), the Iceland Basin (blue) and the West European Basin (purple). Abbreviation referring to SAIW: Sub-Arctic Intermediate Water, ENACW: East North Atlantic Central Water, IrSPMW: Irminger Sub-Polar Mode Water, IcSPMW: Iceland Sub-Polar Mode Water, MOW: Mediterranean Overflow Water, LSW: Labrador Sea Water, ISOW: Iceland-Scotland Overflow Water, DSOW: Denmark Strait Overflow Water, NEADW: North East Atlantic Deep Water.

5

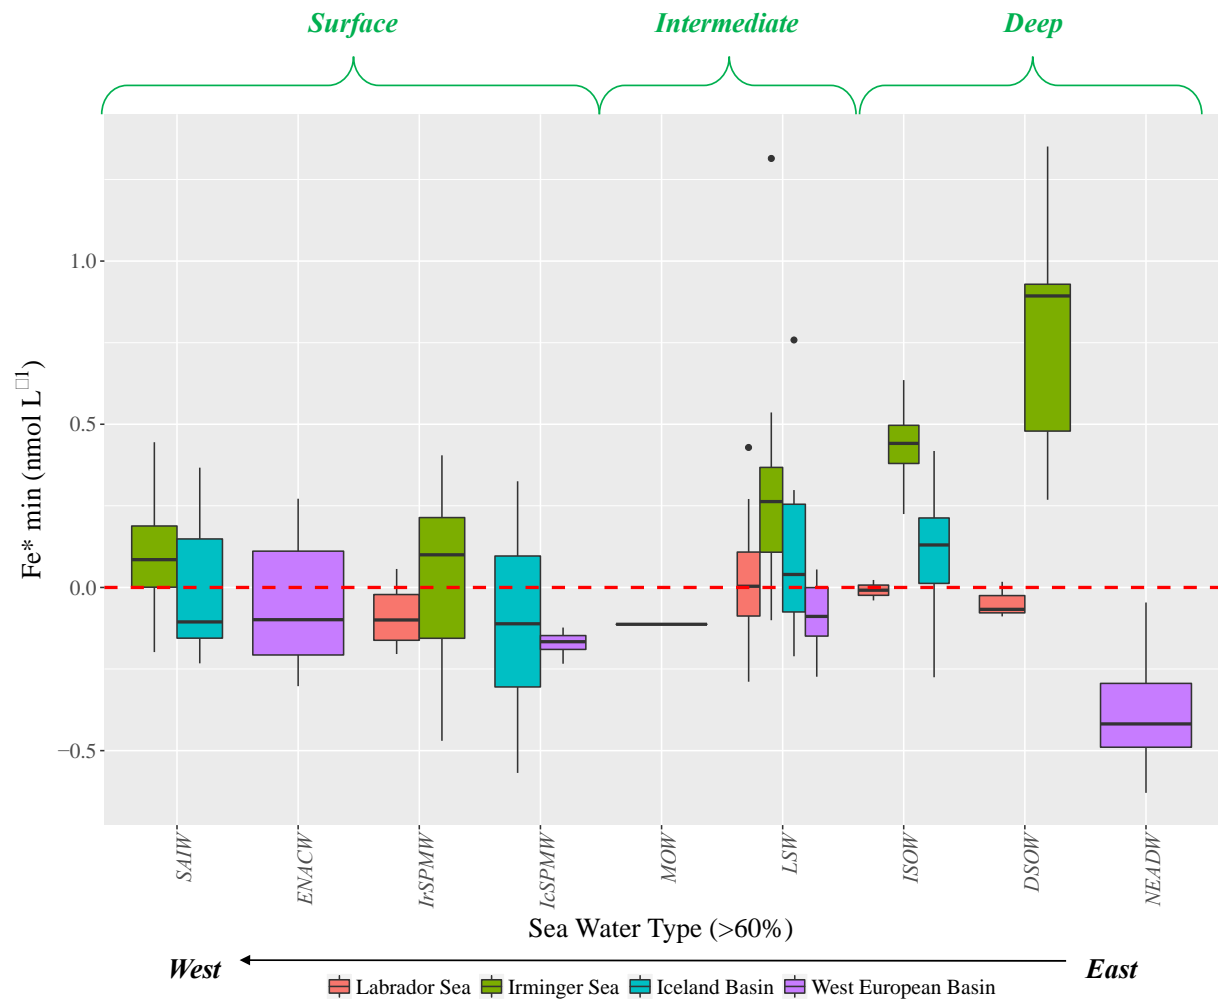

Table S2: Compilation of median dissolved iron (DFe) concentrations (min, max) for Surface (> 200 m depth), Intermediate (from 200 to 1000 m depth) and Deep (>1000 m depth) Waters in the four distinct basins of the GA01 transect and in the Arctic Ocean (data from: the British Oceanographic Data Center website <http://www.amt-uk.org/Data>, PANGAEA website <http://doi.pangaea.de/10.1594/PANGAEA.609968>, Clivar & Carbon Hydrographic Data Office website <https://cchdo.ucsd.edu/search?bbox=-75,-60,20,65> and GEOTRACES intermediate data product 2017 [www.bodc.ac.uk/geotraces/data/idp2017/](http://www.bodc.ac.uk/geotraces/data/idp2017/) and <https://webodv.awi.de/geotraces>). Bold values indicated for each depth range represent the median DFe concentrations all studies considered per basin.

| Area                           | Time period      |      | Fe (nmol L <sup>-1</sup> ) |             | Filtration | Cruise      | Reference                      |
|--------------------------------|------------------|------|----------------------------|-------------|------------|-------------|--------------------------------|
|                                | Months           | Year | range                      | median      | µm         | Name        |                                |
| <b>West European basin</b>     |                  |      |                            |             |            |             |                                |
| <i>surface (&lt;200m)</i>      |                  |      |                            | <b>0.27</b> |            |             |                                |
|                                | May-June         | 2014 | 0.09 - 3.0                 | 0.24        | 0.2/0.45   | GEOVIDE     | <i>this study</i>              |
|                                | May              | 2013 | 0.01 - 0.45                | 0.05        | 0.2        | GA04        | <i>Gerringa et al., 2017</i>   |
|                                | October-November | 2010 | 0.06 - 0.98                | 0.49        | 0.2        | GA03        | <i>Hatta et al., 2015</i>      |
|                                | June             | 2005 | 0.35 - 0.76                | 0.57        | 0.2        | AMT16       | <i>Ussher et al., 2013</i>     |
|                                | September        | 2004 | 0.33 - 2.6                 | 0.49        | 0.2        | AMT15       | <i>Ussher et al., 2013</i>     |
|                                | June-August      | 2003 | 0.02 - 0.25                | 0.08        | 0.4        | CLIVAR-CO2  | <i>Measures et al., 2008</i>   |
|                                | July             | 2003 | 0.05 - 5.4                 | 0.7         | 0.4        | JR98        | <i>Nedelec et al., 2007</i>    |
|                                | October          | 2002 | 0.07 - 7.0                 | 0.35        | 0.2        | IRONAGE III | <i>Sarthou et al., 2007</i>    |
|                                | March            | 2002 | 0.23 - 0.47                | 0.34        | 0.2        | IRONAGES    | <i>Laes et al., 2003</i>       |
|                                | February-March   | 2001 | 0.22 - 0.64                | 0.4         | 0.2/0.45   | POMME       | <i>Blain et al., 2004</i>      |
|                                | June             | 1998 | 0.10 - 1.5                 | 0.71        | unfiltered | AMT6        | <i>Bowie et al., 2002</i>      |
|                                | March            | 1998 | 0.48 - 1.6                 | 0.82        | 0.2        | MERLIM      | <i>Boye et al., 2006; 2003</i> |
|                                | March            | 1998 | 0.34 - 5.9                 | 1           | 0.2        | 64PE114     | <i>de Jong et al., 2007</i>    |
|                                | May              | 1989 | 0.08 - 0.27                | 0.19        | 0.4        | Atlantis II | <i>Martin et al., 1993</i>     |
| <i>intermediate (200-1000)</i> |                  |      |                            | <b>0.71</b> |            |             |                                |
|                                | May-June         | 2014 | 0.23 - 1.4                 | 0.73        | 0.2/0.45   | GEOVIDE     | <i>this study</i>              |
|                                | May              | 2013 | 0.10 - 0.72                | 0.42        | 0.2        | GA04        | <i>Gerringa et al., 2017</i>   |
|                                | October-November | 2010 | 0.38 - 1.0                 | 0.61        | 0.2        | GA03        | <i>Hatta et al., 2015</i>      |
|                                | July             | 2003 | 0.35 - 2.2                 | 1.2         | 0.4        | JR98        | <i>Nedelec et al., 2007</i>    |
|                                | March            | 2002 | 0.57 - 0.86                | 0.64        | 0.2        | IRONAGES    | <i>Laes et al., 2003</i>       |
|                                | June             | 1998 | 0.72 - 0.83                | 0.81        | 0.2        | AMT6        | <i>Bowie et al., 2002</i>      |
|                                | March            | 1998 | 1.1 - 1.6                  | 1.4         | 0.2        | MERLIM      | <i>Boye et al., 2006; 2003</i> |

|                                |                  |      |             |             |          |             |                                 |
|--------------------------------|------------------|------|-------------|-------------|----------|-------------|---------------------------------|
|                                | March            | 1998 | 1.3 - 1.9   | 1.6         | 0.2      | 64PE114     | <i>de Jong et al., 2007</i>     |
|                                | May              | 1989 | 0.26 - 0.57 | 0.35        | 0.4      | Atlantis II | <i>Martin et al., 1993</i>      |
| <i>deep (&gt;1000)</i>         |                  |      |             | <b>0.76</b> |          |             |                                 |
|                                | May-June         | 2014 | 0.53 - 1.6  | 0.78        | 0.2/0.45 | GEOVIDE     | <i>this study</i>               |
|                                | May              | 2013 | 0.44 - 0.87 | 0.61        | 0.2      | GA04        | <i>Gerringa et al., 2017</i>    |
|                                | October-November | 2010 | 0.46 - 1.1  | 0.75        | 0.2      | GA03        | <i>Hatta et al., 2015</i>       |
|                                | July             | 2003 | 1.2 - 4.4   | 1.6         | 0.4      | JR98        | <i>Nedelec et al., 2007</i>     |
|                                | March            | 2002 | 0.67 - 1.2  | 0.82        | 0.2      | IRONAGES    | <i>Laes et al., 2003</i>        |
|                                | June             | 1998 | 0.57 - 0.94 | 0.76        | 0.2      | AMT6        | <i>Bowie et al., 2002</i>       |
|                                | March            | 1998 | 1.3 - 1.6   | 1.4         | 0.2      | MERLIM      | <i>Boye et al., 2006; 2003</i>  |
|                                | March            | 1998 | 1.3 - 2.0   | 1.7         | 0.2      | 64PE114     | <i>de Jong et al., 2007</i>     |
|                                | May              | 1989 | 0.54 - 0.66 | 0.6         | 0.4      | Atlantis II | <i>Martin et al., 1993</i>      |
| <b>Iceland Basin</b>           |                  |      |             |             |          |             |                                 |
| <i>surface (&lt;200m)</i>      |                  |      |             | <b>0.22</b> |          |             |                                 |
|                                | May-June         | 2014 | 0.09 - 0.75 | 0.34        | 0.2/0.45 | GEOVIDE     | <i>this study</i>               |
|                                | July-August      | 2010 | 0.03 - 2.6  | 0.25        | 0.2      | D354        | <i>Achterberg et al., 2018</i>  |
|                                | April-May        | 2010 | 0.11 - 2.6  | 0.3         | 0.2      | D350        | <i>Achterberg et al., 2018</i>  |
|                                | June             | 2009 | 0.08 - 0.87 | 0.24        | 0.2      | D340        | <i>Mohamed et al., 2011</i>     |
|                                | August-September | 2007 | 0.04 - 0.34 | 0.14        | 0.2      | D321        | <i>Mohamed et al., 2011</i>     |
|                                | July-September   | 2007 | 0.02 - 0.41 | 0.06        | 0.2      |             | <i>Nielsdottir et al., 2009</i> |
|                                | June-August      | 2003 | 0.02 - 0.30 | 0.1         | 0.4      | CLIVAR-CO2  | <i>Measures et al., 2008</i>    |
|                                | May              | 1989 | 0.06 - 0.23 | 0.12        | 0.4      | Atlantis II | <i>Martin et al., 1993</i>      |
| <i>intermediate (200-1000)</i> |                  |      |             | <b>0.71</b> |          |             |                                 |
|                                | May-June         | 2014 | 0.28 - 1.6  | 0.94        | 0.2/0.45 | GEOVIDE     | <i>this study</i>               |
|                                | July-August      | 2010 | 0.21 - 2.7  | 0.73        | 0.2      | D354        | <i>Achterberg et al., 2018</i>  |
|                                | April-May        | 2010 | 0.21 - 2.7  | 0.74        | 0.2      | D350        | <i>Achterberg et al., 2018</i>  |
|                                | June             | 2009 | 0.24 - 2.23 | 0.63        | 0.2      | D340        | <i>Mohamed et al., 2011</i>     |
|                                | August-September | 2007 | 0.2 - 0.85  | 0.46        | 0.2      | D321        | <i>Mohamed et al., 2011</i>     |
|                                | July-September   | 2007 | 0.07 - 0.80 | 0.4         | 0.2      |             | <i>Nielsdottir et al., 2009</i> |
|                                | May              | 1989 | 0.17 - 0.54 | 0.37        | 0.4      | Atlantis II | <i>Martin et al., 1993</i>      |
| <i>deep (&gt;1000)</i>         |                  |      |             | <b>0.87</b> |          |             |                                 |

|                       |                                |      |             |             |          |             |                                |
|-----------------------|--------------------------------|------|-------------|-------------|----------|-------------|--------------------------------|
|                       | May-June                       | 2014 | 0.63 - 1.5  | 0.92        | 0.2/0.45 | GEOVIDE     | <i>this study</i>              |
|                       | July-August                    | 2010 | 0.47 - 1.67 | 0.92        | 0.2      | D354        | <i>Achterberg et al., 2018</i> |
|                       | April-May                      | 2010 | 0.47 - 1.9  | 0.77        | 0.2      | D350        | <i>Achterberg et al., 2018</i> |
|                       | June                           | 2009 | 1.42 - 2.6  | 1.51        | 0.2      | D340        | <i>Mohamed et al., 2011</i>    |
|                       | August-September               | 2007 | 0.08 - 1.5  | 0.71        | 0.2      | D321        | <i>Mohamed et al., 2011</i>    |
|                       | May                            | 1989 | 0.53 - 0.79 | 0.59        | 0.4      | Atlantis II | <i>Martin et al., 1993</i>     |
| <hr/>                 |                                |      |             |             |          |             |                                |
| <b>Irminger Basin</b> |                                |      |             |             |          |             |                                |
|                       | <i>surface (&lt;200m)</i>      |      |             | <b>0.18</b> |          |             |                                |
|                       | May-June                       | 2014 | 0.22 - 3    | 0.55        | 0.2/0.45 | GEOVIDE     | <i>this study</i>              |
|                       | July-August                    | 2010 | 0 - 3.3     | 0.15        | 0.2      | D354        | <i>Achterberg et al., 2018</i> |
|                       | April-May                      | 2010 | 0.03 - 0.97 | 0.11        | 0.2      | D350        | <i>Achterberg et al., 2018</i> |
|                       | April-May                      | 2010 | 0.08 - 0.55 | 0.15        | 0.2      | GA02        | <i>Rijkenberg et al., 2014</i> |
| <hr/>                 |                                |      |             |             |          |             |                                |
|                       | <i>intermediate (200-1000)</i> |      |             | <b>0.47</b> |          |             |                                |
|                       | May-June                       | 2014 | 0.33 - 1.2  | 0.86        | 0.2/0.45 | GEOVIDE     | <i>this study</i>              |
|                       | July-August                    | 2010 | 0.03 - 1.21 | 0.42        | 0.2      | D354        | <i>Achterberg et al., 2018</i> |
|                       | April-May                      | 2010 | 0.03 - 0.63 | 0.29        | 0.2      | D350        | <i>Achterberg et al., 2018</i> |
|                       | April-May                      | 2010 | 0.28 - 0.69 | 0.48        | 0.2      | GA02        | <i>Rijkenberg et al., 2014</i> |
| <hr/>                 |                                |      |             |             |          |             |                                |
|                       | <i>deep (&gt;1000)</i>         |      |             | <b>0.78</b> |          |             |                                |
|                       | May-June                       | 2014 | 0.82 - 2.5  | 1.14        | 0.2/0.45 | GEOVIDE     | <i>this study</i>              |
|                       | July-August                    | 2010 | 0.39 - 1.01 | 0.7         | 0.2      | D354        | <i>Achterberg et al., 2018</i> |
|                       | April-May                      | 2010 | 0.50 - 1.0  | 0.71        | 0.2      | D350        | <i>Achterberg et al., 2018</i> |
|                       | April-May                      | 2010 | 0.65 - 0.99 | 0.75        | 0.2      | GA02        | <i>Rijkenberg et al., 2014</i> |
| <hr/>                 |                                |      |             |             |          |             |                                |
| <b>Labrador Basin</b> |                                |      |             |             |          |             |                                |
|                       | <i>surface (&lt;200m)</i>      |      |             | <b>0.33</b> |          |             |                                |
|                       | May-June                       | 2014 | 0.11 - 2.4  | 0.55        | 0.2/0.45 | GEOVIDE     | <i>this study</i>              |
|                       | April-May                      | 2010 | 0.05 - 0.58 | 0.17        | 0.2      | GA02        | <i>Rijkenberg et al., 2014</i> |
| <hr/>                 |                                |      |             |             |          |             |                                |
|                       | <i>intermediate (200-1000)</i> |      |             | <b>0.67</b> |          |             |                                |
|                       | May-June                       | 2014 | 0.61 - 7.6  | 0.8         | 0.2/0.45 | GEOVIDE     | <i>this study</i>              |
|                       | April-May                      | 2010 | 0.35 - 0.87 | 0.55        | 0.2      | GA02        | <i>Rijkenberg et al., 2014</i> |
| <hr/>                 |                                |      |             |             |          |             |                                |
|                       | <i>deep (&gt;1000)</i>         |      |             | <b>0.69</b> |          |             |                                |
|                       | May-June                       | 2014 | 0.60 - 1.1  | 0.85        | 0.2/0.45 | GEOVIDE     | <i>this study</i>              |

|                                |                    |      |             |      |            |             |                                   |
|--------------------------------|--------------------|------|-------------|------|------------|-------------|-----------------------------------|
|                                | April-May          | 2010 | 0.47 - 0.66 | 0.59 | 0.2        | GA02        | <i>Rijkenberg et al., 2014</i>    |
| <b>Arctic Ocean</b>            |                    |      |             |      |            |             |                                   |
| <i>surface (&lt;200m)</i>      | July               | 2008 | 2.1 - 16    |      | 0.22       |             | <i>Nishimura et al., 2012</i>     |
|                                | September          | 2008 | 0.5 - 3.2   |      | 0.22       | MR 08-04    | <i>Nakayama et al., 2011</i>      |
|                                | August - September | 2007 | 0.10 - > 10 | 0.6  | 0.2        | ARK XXII/2  | <i>Klunder et al., 2012</i>       |
|                                | July               | 2007 | 5.7 - 23    |      | unfiltered | ATOS-Arctic | <i>Tovar-Sanchez et al., 2010</i> |
|                                | April-May          | 2007 | 0.8 - 3.1   | 1.5  | 0.4        |             | <i>Aguilar-Islas et al., 2008</i> |
| <i>intermediate (200-1000)</i> | August - September | 2007 | 0.20 - 1.4  | 0.5  | 0.2        | ARK XXII/2  | <i>Klunder et al., 2012</i>       |
| <i>deep (&gt;1000)</i>         | August - September | 2007 | 0.18 - 1.7  | 0.56 | 0.2        | ARK XXII/2  | <i>Klunder et al., 2012</i>       |

**Table S1: Table of dissolved iron (DFe) data for the whole GEOVIDE section. Bold characters denote stations located above the shelves. Note that QC refers to the data quality (1 = good data, 2 = questionable, 3 = bad data, were removed).**

| <b>Station</b> | <b>Lat</b>  | <b>Lon</b>  | <b>Bottle</b> | <b>Depth</b> | <b>DFe</b>         |                   |           | <b>QC</b>  |
|----------------|-------------|-------------|---------------|--------------|--------------------|-------------------|-----------|------------|
| <b>(#)</b>     | <b>(°N)</b> | <b>(°E)</b> | <b>(#)</b>    | <b>(m)</b>   | <b>(nmol kg-1)</b> | <b>(nmol L-1)</b> | <b>SD</b> | <b>(#)</b> |
| <b>1</b>       | 40.333      | -10.036     | 24            | 21           | 1.04               | 1.07              | ± 0.12    | 2          |
|                |             |             | 22            | 60           | 0.50               | 0.51              | ± 0.06    | 1          |
|                |             |             | 21            | 81           | 0.72               | 0.74              | ± 0.09    | 1          |
|                |             |             | 20            | 102          | 0.82               | 0.84              | ± 0.10    | 1          |
|                |             |             | 19            | 151          | 0.94               | 0.96              | ± 0.11    | 1          |
|                |             |             | 18            | 201          | 1.23               | 1.26              | ± 0.15    | 2          |
|                |             |             | 17            | 300          | 1.05               | 1.08              | ± 0.13    | 1          |
|                |             |             | 16            | 387          | 1.28               | 1.31              | ± 0.15    | 1          |
|                |             |             | 15            | 501          | 1.40               | 1.44              | ± 0.17    | 1          |
|                |             |             | 14            | 589          | 1.37               | 1.40              | ± 0.16    | 1          |
|                |             |             | 13            | 693          | 1.36               | 1.39              | ± 0.16    | 1          |
|                |             |             | 12            | 792          | 1.22               | 1.25              | ± 0.15    | 1          |
|                |             |             | 11            | 889          | 1.13               | 1.16              | ± 0.14    | 1          |
|                |             |             | 10            | 990          | 1.04               | 1.07              | ± 0.12    | 1          |
|                |             |             | 9             | 1185         | 1.18               | 1.21              | ± 0.14    | 1          |
|                |             |             | 8             | 1384         | 1.11               | 1.14              | ± 0.13    | 1          |
|                |             |             | 7             | 1582         | 1.40               | 1.44              | ± 0.17    | 2          |
|                |             |             | 6             | 1778         | 1.39               | 1.42              | ± 0.17    | 2          |
|                |             |             | 5             | 1976         | 0.67               | 0.69              | ± 0.08    | 1          |
| 4              | 2466        | 1.01        | 1.04          | ± 0.12       | 1                  |                   |           |            |
| 3              | 2957        | 1.60        | 1.64          | ± 0.19       | 2                  |                   |           |            |
| 2              | 3201        | 0.92        | 0.94          | ± 0.11       | 1                  |                   |           |            |
| 1              | 3521        | 0.80        | 0.82          | ± 0.10       | 1                  |                   |           |            |
| <b>2</b>       | 40.333      | -9.46       | 21            | 19           | 0.99               | 1.01              | ± 0.04    | 1          |
|                |             |             | 19            | 37           | 0.36               | 0.37              | ± 0.01    | 1          |
|                |             |             | 14            | 50           | 0.46               | 0.47              | ± 0.02    | 1          |
|                |             |             | 13            | 75           | 0.61               | 0.63              | ± 0.02    | 1          |
|                |             |             | 9             | 99           | 0.73               | 0.75              | ± 0.03    | 1          |
| 5              | 119         | 0.56        | 0.57          | ± 0.02       | 1                  |                   |           |            |
| <b>4</b>       | 40.333      | -9.767      | 1             | 137          | 2.97               | 3.04              | ± 0.12    | 1          |
|                |             |             | 23            | 21           | 0.71               | 0.73              | ± 0.03    | 2          |

|    |        |         |    |      |      |      |        |   |
|----|--------|---------|----|------|------|------|--------|---|
|    |        |         | 21 | 39   | 0.33 | 0.34 | ± 0.01 | 1 |
|    |        |         | 19 | 71   | 0.51 | 0.52 | ± 0.02 | 1 |
|    |        |         | 15 | 149  | 0.59 | 0.60 | ± 0.02 | 1 |
|    |        |         | 13 | 200  | 0.87 | 0.89 | ± 0.03 | 2 |
|    |        |         | 11 | 300  | 0.55 | 0.56 | ± 0.02 | 1 |
|    |        |         | 9  | 398  | 0.72 | 0.74 | ± 0.03 | 1 |
|    |        |         | 7  | 496  | 0.79 | 0.81 | ± 0.03 | 1 |
|    |        |         | 5  | 596  | 0.84 | 0.86 | ± 0.03 | 1 |
|    |        |         | 3  | 694  | 1.00 | 1.03 | ± 0.04 | 1 |
|    |        |         | 1  | 792  | 0.83 | 0.85 | ± 0.03 | 1 |
| 11 | 40.333 | -12.219 | 24 | 15   | 0.12 | 0.12 | ± 0.01 | 1 |
|    |        |         | 23 | 25   | 0.27 | 0.28 | ± 0.02 | 3 |
|    |        |         | 22 | 54   | 0.19 | 0.19 | ± 0.01 | 1 |
|    |        |         | 21 | 80   | 0.18 | 0.18 | ± 0.01 | 1 |
|    |        |         | 20 | 100  | 0.23 | 0.24 | ± 0.02 | 1 |
|    |        |         | 19 | 199  | 0.28 | 0.29 | ± 0.02 | 1 |
|    |        |         | 16 | 497  | 0.55 | 0.56 | ± 0.04 | 1 |
|    |        |         | 14 | 695  | 0.74 | 0.76 | ± 0.05 | 1 |
|    |        |         | 13 | 793  | 0.79 | 0.81 | ± 0.06 | 1 |
|    |        |         | 12 | 991  | 0.76 | 0.78 | ± 0.05 | 1 |
|    |        |         | 11 | 1188 | 0.72 | 0.74 | ± 0.05 | 1 |
|    |        |         | 9  | 1582 | 0.80 | 0.82 | ± 0.06 | 1 |
|    |        |         | 8  | 1779 | 0.75 | 0.77 | ± 0.05 | 1 |
|    |        |         | 7  | 1976 | 0.76 | 0.78 | ± 0.05 | 1 |
|    |        |         | 6  | 2466 | 0.73 | 0.75 | ± 0.05 | 1 |
|    |        |         | 5  | 2954 | 0.85 | 0.87 | ± 0.06 | 1 |
|    |        |         | 4  | 3445 | 0.77 | 0.79 | ± 0.05 | 1 |
|    |        |         | 3  | 3933 | 0.68 | 0.70 | ± 0.05 | 1 |
|    |        |         | 2  | 4904 | 0.63 | 0.65 | ± 0.04 | 1 |
|    |        |         | 1  | 5241 | 0.61 | 0.63 | ± 0.04 | 1 |
| 13 | 41.383 | -13.888 | 24 | 11   | 0.22 | 0.23 | ± 0.02 | 1 |
|    |        |         | 23 | 30   | 0.26 | 0.27 | ± 0.03 | 1 |
|    |        |         | 22 | 51   | 0.25 | 0.26 | ± 0.02 | 1 |
|    |        |         | 21 | 75   | 0.35 | 0.36 | ± 0.03 | 1 |
|    |        |         | 20 | 100  | 0.50 | 0.51 | ± 0.05 | 1 |
|    |        |         | 19 | 150  | 0.29 | 0.30 | ± 0.03 | 3 |



|    |        |         |    |      |      |      |        |   |
|----|--------|---------|----|------|------|------|--------|---|
|    |        |         | 16 | 199  | 0.59 | 0.60 | ± 0.06 | 1 |
|    |        |         | 15 | 298  | 0.60 | 0.62 | ± 0.06 | 1 |
|    |        |         | 14 | 397  | 0.69 | 0.71 | ± 0.07 | 1 |
|    |        |         | 13 | 496  | 0.69 | 0.71 | ± 0.07 | 1 |
| 15 | 42.581 | -15.461 | 24 | 20   | 0.24 | 0.25 | ± 0.02 | 1 |
|    |        |         | 23 | 30   | 0.19 | 0.19 | ± 0.02 | 1 |
|    |        |         | 22 | 49   | 0.14 | 0.14 | ± 0.01 | 1 |
|    |        |         | 21 | 60   | 0.32 | 0.33 | ± 0.03 | 2 |
|    |        |         | 20 | 70   | 0.25 | 0.26 | ± 0.02 | 2 |
|    |        |         | 19 | 99   | 0.17 | 0.17 | ± 0.02 | 1 |
|    |        |         | 16 | 298  | 0.26 | 0.27 | ± 0.03 | 1 |
|    |        |         | 15 | 397  | 0.34 | 0.35 | ± 0.03 | 1 |
|    |        |         | 14 | 496  | 0.44 | 0.45 | ± 0.04 | 1 |
|    |        |         | 13 | 644  | 0.65 | 0.67 | ± 0.07 | 1 |
|    |        |         | 12 | 793  | 0.65 | 0.67 | ± 0.06 | 1 |
|    |        |         | 11 | 989  | 0.74 | 0.76 | ± 0.07 | 1 |
|    |        |         | 10 | 1089 | 0.72 | 0.74 | ± 0.07 | 1 |
|    |        |         | 9  | 1384 | 0.60 | 0.62 | ± 0.06 | 1 |
|    |        |         | 8  | 1581 | 0.68 | 0.70 | ± 0.07 | 1 |
|    |        |         | 7  | 1779 | 0.70 | 0.72 | ± 0.07 | 1 |
|    |        |         | 6  | 1975 | 0.65 | 0.67 | ± 0.06 | 1 |
|    |        |         | 5  | 2466 | 0.71 | 0.73 | ± 0.07 | 1 |
|    |        |         | 4  | 2956 | 0.73 | 0.75 | ± 0.07 | 1 |
|    |        |         | 3  | 3932 | 0.56 | 0.57 | ± 0.06 | 1 |
|    |        |         | 2  | 4904 | 0.53 | 0.54 | ± 0.05 | 1 |
|    |        |         | 1  | 5020 | 0.57 | 0.58 | ± 0.06 | 1 |
| 17 | 43.78  | -17.032 | 24 | 15   | 0.17 | 0.17 | ± 0.01 | 1 |
|    |        |         | 23 | 30   | 0.88 | 0.91 | ± 0.06 | 3 |
|    |        |         | 22 | 44   | 0.52 | 0.53 | ± 0.04 | 1 |
|    |        |         | 21 | 60   | 0.54 | 0.55 | ± 0.04 | 1 |
|    |        |         | 20 | 69   | 0.56 | 0.57 | ± 0.04 | 1 |
|    |        |         | 19 | 99   | 0.54 | 0.55 | ± 0.04 | 1 |
|    |        |         | 16 | 199  | 0.56 | 0.57 | ± 0.04 | 1 |
|    |        |         | 15 | 348  | 0.76 | 0.78 | ± 0.05 | 1 |
|    |        |         | 14 | 396  | 1.04 | 1.07 | ± 0.07 | 1 |
|    |        |         | 13 | 496  | 0.96 | 0.98 | ± 0.07 | 1 |

|    |        |         |    |      |      |      |        |   |
|----|--------|---------|----|------|------|------|--------|---|
|    |        |         | 12 | 595  | 1.03 | 1.06 | ± 0.07 | 1 |
|    |        |         | 11 | 792  | 1.21 | 1.24 | ± 0.08 | 1 |
|    |        |         | 10 | 990  | 1.08 | 1.11 | ± 0.08 | 1 |
|    |        |         | 9  | 1188 | 1.35 | 1.38 | ± 0.09 | 1 |
|    |        |         | 8  | 1385 | 1.23 | 1.26 | ± 0.09 | 1 |
|    |        |         | 7  | 1581 | 1.31 | 1.34 | ± 0.09 | 1 |
|    |        |         | 4  | 2465 | 1.25 | 1.28 | ± 0.09 | 1 |
|    |        |         | 3  | 2955 | 1.27 | 1.30 | ± 0.09 | 1 |
|    |        |         | 2  | 3444 | 1.31 | 1.34 | ± 0.09 | 1 |
| 19 | 45.05  | -18.505 | 24 | 20   | 0.09 | 0.09 | ± 0.01 | 1 |
|    |        |         | 23 | 30   | 0.31 | 0.32 | ± 0.03 | 3 |
|    |        |         | 22 | 40   | 0.17 | 0.17 | ± 0.02 | 1 |
|    |        |         | 21 | 50   | 0.10 | 0.10 | ± 0.01 | 1 |
|    |        |         | 20 | 99   | 0.17 | 0.17 | ± 0.02 | 1 |
|    |        |         | 19 | 200  | 0.31 | 0.32 | ± 0.03 | 1 |
|    |        |         | 16 | 298  | 0.23 | 0.24 | ± 0.02 | 1 |
|    |        |         | 15 | 397  | 0.36 | 0.37 | ± 0.04 | 1 |
|    |        |         | 14 | 496  | 0.48 | 0.49 | ± 0.05 | 1 |
|    |        |         | 13 | 595  | 0.53 | 0.54 | ± 0.05 | 1 |
|    |        |         | 12 | 793  | 0.71 | 0.73 | ± 0.07 | 1 |
|    |        |         | 11 | 991  | 0.74 | 0.76 | ± 0.07 | 1 |
|    |        |         | 10 | 1188 | 0.78 | 0.80 | ± 0.08 | 1 |
|    |        |         | 9  | 1386 | 0.68 | 0.70 | ± 0.07 | 1 |
|    |        |         | 8  | 1582 | 0.77 | 0.79 | ± 0.08 | 1 |
|    |        |         | 7  | 1779 | 0.78 | 0.80 | ± 0.08 | 1 |
|    |        |         | 6  | 1975 | 0.80 | 0.82 | ± 0.08 | 1 |
|    |        |         | 5  | 2221 | 0.86 | 0.88 | ± 0.09 | 1 |
|    |        |         | 4  | 2466 | 1.13 | 1.16 | ± 0.11 | 3 |
|    |        |         | 3  | 2955 | 0.87 | 0.89 | ± 0.09 | 1 |
|    |        |         | 2  | 3930 | 0.99 | 1.01 | ± 0.10 | 1 |
|    |        |         | 1  | 4538 | 0.99 | 1.01 | ± 0.10 | 1 |
| 21 | 46.544 | -19.672 | 24 | 19   | 0.17 | 0.17 | ± 0.01 | 1 |
|    |        |         | 23 | 30   | 0.28 | 0.29 | ± 0.02 | 2 |
|    |        |         | 22 | 49   | 0.20 | 0.21 | ± 0.01 | 1 |
|    |        |         | 21 | 79   | 0.14 | 0.14 | ± 0.01 | 1 |
|    |        |         | 20 | 99   | 0.17 | 0.17 | ± 0.01 | 1 |

|    |        |         |    |      |      |      |        |   |
|----|--------|---------|----|------|------|------|--------|---|
|    |        |         | 19 | 198  | 0.24 | 0.25 | ± 0.02 | 1 |
|    |        |         | 16 | 297  | 0.34 | 0.35 | ± 0.02 | 1 |
|    |        |         | 15 | 397  | 0.35 | 0.36 | ± 0.02 | 1 |
|    |        |         | 14 | 496  | 0.35 | 0.36 | ± 0.02 | 1 |
|    |        |         | 13 | 594  | 0.35 | 0.36 | ± 0.02 | 1 |
|    |        |         | 12 | 693  | 0.53 | 0.54 | ± 0.04 | 1 |
|    |        |         | 11 | 792  | 0.83 | 0.85 | ± 0.06 | 1 |
|    |        |         | 10 | 989  | 0.79 | 0.81 | ± 0.06 | 1 |
|    |        |         | 9  | 1236 | 0.76 | 0.78 | ± 0.05 | 1 |
|    |        |         | 8  | 1482 | 0.74 | 0.76 | ± 0.05 | 1 |
|    |        |         | 7  | 1976 | 0.81 | 0.83 | ± 0.06 | 1 |
|    |        |         | 6  | 2269 | 0.88 | 0.90 | ± 0.06 | 1 |
|    |        |         | 5  | 2759 | 0.70 | 0.72 | ± 0.05 | 1 |
|    |        |         | 4  | 2955 | 0.88 | 0.90 | ± 0.06 | 1 |
|    |        |         | 3  | 3442 | 0.78 | 0.80 | ± 0.05 | 1 |
|    |        |         | 2  | 4417 | 1.29 | 1.32 | ± 0.09 | 3 |
|    |        |         | 1  | 4506 | 0.71 | 0.73 | ± 0.05 | 1 |
| 23 | 48.039 | -20.848 | 24 | 20   | 0.17 | 0.17 | ± 0.01 | 1 |
|    |        |         | 23 | 29   | 0.18 | 0.18 | ± 0.01 | 1 |
|    |        |         | 22 | 40   | 0.15 | 0.15 | ± 0.01 | 1 |
|    |        |         | 21 | 50   | 0.18 | 0.18 | ± 0.01 | 1 |
|    |        |         | 20 | 60   | 0.25 | 0.26 | ± 0.02 | 1 |
|    |        |         | 19 | 70   | 0.28 | 0.29 | ± 0.02 | 1 |
|    |        |         | 16 | 100  | 0.34 | 0.35 | ± 0.02 | 1 |
|    |        |         | 15 | 199  | 0.73 | 0.75 | ± 0.05 | 1 |
|    |        |         | 14 | 397  | 0.66 | 0.68 | ± 0.05 | 1 |
|    |        |         | 13 | 594  | 0.32 | 0.33 | ± 0.02 | 3 |
|    |        |         | 12 | 792  | 0.73 | 0.75 | ± 0.05 | 1 |
|    |        |         | 10 | 1187 | 0.65 | 0.67 | ± 0.05 | 1 |
|    |        |         | 9  | 1384 | 0.69 | 0.71 | ± 0.05 | 1 |
|    |        |         | 8  | 1581 | 0.75 | 0.77 | ± 0.05 | 1 |
|    |        |         | 7  | 1778 | 0.70 | 0.72 | ± 0.05 | 1 |
|    |        |         | 6  | 1974 | 0.77 | 0.79 | ± 0.05 | 1 |
|    |        |         | 5  | 2269 | 0.92 | 0.94 | ± 0.06 | 1 |
|    |        |         | 4  | 2954 | 0.79 | 0.81 | ± 0.06 | 1 |
|    |        |         | 3  | 3443 | 0.80 | 0.82 | ± 0.06 | 1 |

|    |        |         |    |      |      |      |        |   |
|----|--------|---------|----|------|------|------|--------|---|
|    |        |         | 2  | 3930 | 0.62 | 0.64 | ± 0.04 | 1 |
|    |        |         | 1  | 4442 | 0.75 | 0.77 | ± 0.05 | 1 |
| 25 | 49.529 | -22.017 | 24 | 14   | 0.19 | 0.19 | ± 0.02 | 1 |
|    |        |         | 23 | 25   | 0.13 | 0.13 | ± 0.01 | 1 |
|    |        |         | 21 | 49   | 0.14 | 0.14 | ± 0.01 | 1 |
|    |        |         | 20 | 74   | 0.19 | 0.19 | ± 0.02 | 1 |
|    |        |         | 19 | 99   | 0.23 | 0.24 | ± 0.02 | 1 |
|    |        |         | 16 | 198  | 0.34 | 0.35 | ± 0.03 | 1 |
|    |        |         | 15 | 346  | 0.38 | 0.39 | ± 0.04 | 1 |
|    |        |         | 14 | 495  | 0.44 | 0.45 | ± 0.04 | 1 |
|    |        |         | 13 | 643  | 0.58 | 0.59 | ± 0.06 | 1 |
|    |        |         | 12 | 792  | 0.78 | 0.80 | ± 0.08 | 1 |
|    |        |         | 11 | 990  | 0.92 | 0.94 | ± 0.09 | 1 |
|    |        |         | 10 | 1187 | 0.76 | 0.78 | ± 0.08 | 1 |
|    |        |         | 9  | 1386 | 0.87 | 0.89 | ± 0.09 | 1 |
|    |        |         | 8  | 1580 | 0.87 | 0.89 | ± 0.09 | 1 |
|    |        |         | 7  | 1778 | 0.79 | 0.81 | ± 0.08 | 1 |
|    |        |         | 6  | 1974 | 0.87 | 0.89 | ± 0.09 | 1 |
|    |        |         | 5  | 2563 | 1.07 | 1.10 | ± 0.11 | 3 |
|    |        |         | 4  | 2955 | 0.84 | 0.86 | ± 0.08 | 1 |
|    |        |         | 3  | 3441 | 0.83 | 0.85 | ± 0.08 | 1 |
|    |        |         | 2  | 3930 | 1.03 | 1.06 | ± 0.10 | 1 |
|    |        |         | 1  | 4191 | 0.69 | 0.71 | ± 0.07 | 1 |
| 26 | 50.278 | -22.603 | 22 | 20   | 0.18 | 0.18 | ± 0.02 | 1 |
|    |        |         | 21 | 34   | 0.15 | 0.15 | ± 0.01 | 1 |
|    |        |         | 20 | 50   | 0.15 | 0.15 | ± 0.02 | 1 |
|    |        |         | 19 | 69   | 0.15 | 0.15 | ± 0.02 | 1 |
|    |        |         | 18 | 97   | 0.18 | 0.18 | ± 0.02 | 1 |
|    |        |         | 17 | 150  | 0.43 | 0.44 | ± 0.04 | 1 |
|    |        |         | 16 | 199  | 0.39 | 0.40 | ± 0.04 | 1 |
|    |        |         | 15 | 297  | 0.57 | 0.58 | ± 0.06 | 1 |
|    |        |         | 14 | 396  | 0.62 | 0.64 | ± 0.06 | 1 |
|    |        |         | 13 | 496  | 0.82 | 0.84 | ± 0.08 | 1 |
|    |        |         | 12 | 594  | 0.80 | 0.82 | ± 0.08 | 1 |
|    |        |         | 11 | 742  | 0.76 | 0.78 | ± 0.08 | 1 |
|    |        |         | 10 | 891  | 0.74 | 0.76 | ± 0.07 | 1 |

|    |        |         |    |      |      |      |        |   |
|----|--------|---------|----|------|------|------|--------|---|
|    |        |         | 9  | 989  | 0.83 | 0.85 | ± 0.08 | 1 |
|    |        |         | 8  | 1186 | 0.89 | 0.91 | ± 0.09 | 1 |
|    |        |         | 7  | 1384 | 0.83 | 0.85 | ± 0.08 | 1 |
|    |        |         | 6  | 1580 | 0.92 | 0.94 | ± 0.09 | 1 |
|    |        |         | 5  | 1974 | 0.90 | 0.92 | ± 0.09 | 1 |
|    |        |         | 4  | 2268 | 0.87 | 0.89 | ± 0.09 | 1 |
|    |        |         | 3  | 2953 | 0.75 | 0.77 | ± 0.08 | 1 |
|    |        |         | 2  | 3929 | 0.61 | 0.63 | ± 0.06 | 1 |
|    |        |         | 1  | 4116 | 0.63 | 0.65 | ± 0.06 | 1 |
| 29 | 53.019 | -24.752 | 22 | 15   | 0.17 | 0.17 | ± 0.02 | 1 |
|    |        |         | 21 | 25   | 0.75 | 0.77 | ± 0.08 | 2 |
|    |        |         | 20 | 50   | 0.66 | 0.68 | ± 0.07 | 2 |
|    |        |         | 19 | 75   | 0.52 | 0.53 | ± 0.05 | 1 |
|    |        |         | 18 | 99   | 0.64 | 0.66 | ± 0.06 | 1 |
|    |        |         | 17 | 149  | 0.71 | 0.73 | ± 0.07 | 1 |
|    |        |         | 16 | 198  | 1.14 | 1.17 | ± 0.11 | 1 |
|    |        |         | 15 | 298  | 1.02 | 1.05 | ± 0.10 | 1 |
|    |        |         | 14 | 397  | 0.98 | 1.00 | ± 0.10 | 1 |
|    |        |         | 13 | 495  | 0.95 | 0.97 | ± 0.09 | 1 |
|    |        |         | 11 | 791  | 0.98 | 1.00 | ± 0.10 | 1 |
|    |        |         | 10 | 890  | 1.10 | 1.13 | ± 0.11 | 1 |
|    |        |         | 9  | 1087 | 0.99 | 1.01 | ± 0.10 | 1 |
|    |        |         | 8  | 1185 | 0.85 | 0.87 | ± 0.09 | 1 |
|    |        |         | 7  | 1382 | 0.92 | 0.94 | ± 0.09 | 1 |
|    |        |         | 6  | 1581 | 0.93 | 0.95 | ± 0.09 | 1 |
|    |        |         | 5  | 1776 | 0.71 | 0.73 | ± 0.07 | 1 |
|    |        |         | 4  | 1973 | 0.65 | 0.67 | ± 0.06 | 1 |
|    |        |         | 3  | 2464 | 1.09 | 1.12 | ± 0.11 | 1 |
|    |        |         | 2  | 2953 | 0.98 | 1.00 | ± 0.10 | 1 |
|    |        |         | 1  | 3522 | 0.69 | 0.71 | ± 0.07 | 1 |
| 32 | 55.506 | -26.71  | 22 | 16   | 0.52 | 0.53 | ± 0.05 | 1 |
|    |        |         | 21 | 26   | 0.64 | 0.66 | ± 0.06 | 1 |
|    |        |         | 20 | 51   | 0.18 | 0.18 | ± 0.02 | 1 |
|    |        |         | 19 | 101  | 0.22 | 0.23 | ± 0.02 | 1 |
|    |        |         | 18 | 198  | 0.39 | 0.40 | ± 0.04 | 1 |
|    |        |         | 17 | 298  | 0.49 | 0.50 | ± 0.05 | 1 |

34 57.004 -27.879

|    |      |      |      |        |   |
|----|------|------|------|--------|---|
| 16 | 376  | 1.99 | 2.04 | ± 0.20 | 3 |
| 15 | 446  | 0.84 | 0.86 | ± 0.08 | 1 |
| 14 | 596  | 1.43 | 1.47 | ± 0.14 | 3 |
| 13 | 691  | 2.02 | 2.07 | ± 0.20 | 3 |
| 12 | 793  | 0.82 | 0.84 | ± 0.08 | 1 |
| 11 | 990  | 0.71 | 0.73 | ± 0.07 | 1 |
| 10 | 1186 | 0.67 | 0.69 | ± 0.07 | 1 |
| 9  | 1383 | 1.08 | 1.11 | ± 0.11 | 2 |
| 8  | 1532 | 2.53 | 2.60 | ± 0.25 | 3 |
| 7  | 1680 | 1.11 | 1.14 | ± 0.11 | 2 |
| 6  | 1974 | 0.92 | 0.94 | ± 0.09 | 1 |
| 5  | 2218 | 0.92 | 0.94 | ± 0.09 | 1 |
| 4  | 2464 | 0.97 | 0.99 | ± 0.10 | 1 |
| 3  | 2758 | 1.02 | 1.05 | ± 0.10 | 1 |
| 2  | 2952 | 0.71 | 0.73 | ± 0.07 | 1 |
| 1  | 3217 | 0.63 | 0.65 | ± 0.06 | 1 |
| 22 | 11   | 2.23 | 2.28 | ± 0.16 | 3 |
| 21 | 29   | 0.54 | 0.55 | ± 0.04 | 1 |
| 20 | 46   | 0.28 | 0.29 | ± 0.02 | 1 |
| 19 | 60   | 0.53 | 0.54 | ± 0.04 | 1 |
| 18 | 100  | 0.55 | 0.56 | ± 0.04 | 1 |
| 17 | 199  | 0.85 | 0.87 | ± 0.06 | 1 |
| 16 | 298  | 1.06 | 1.09 | ± 0.07 | 1 |
| 15 | 377  | 1.01 | 1.04 | ± 0.07 | 1 |
| 14 | 445  | 1.13 | 1.16 | ± 0.08 | 1 |
| 13 | 595  | 0.83 | 0.85 | ± 0.06 | 1 |
| 12 | 693  | 1.01 | 1.04 | ± 0.07 | 1 |
| 11 | 841  | 1.15 | 1.18 | ± 0.08 | 1 |
| 9  | 1186 | 0.79 | 0.81 | ± 0.06 | 1 |
| 8  | 1383 | 0.87 | 0.89 | ± 0.06 | 1 |
| 7  | 1580 | 0.80 | 0.82 | ± 0.06 | 1 |
| 6  | 1777 | 0.88 | 0.90 | ± 0.06 | 1 |
| 4  | 2364 | 1.19 | 1.22 | ± 0.08 | 1 |
| 3  | 2561 | 0.91 | 0.93 | ± 0.06 | 1 |
| 2  | 2562 | 0.88 | 0.90 | ± 0.06 | 1 |
| 1  | 2733 | 0.97 | 0.99 | ± 0.07 | 1 |

|    |        |         |    |      |      |      |        |   |
|----|--------|---------|----|------|------|------|--------|---|
| 36 | 58.207 | -29.725 | 20 | 20   | 0.12 | 0.12 | ± 0.02 | 1 |
|    |        |         | 19 | 39   | 0.09 | 0.09 | ± 0.01 | 1 |
|    |        |         | 18 | 69   | 0.15 | 0.15 | ± 0.02 | 1 |
|    |        |         | 16 | 124  | 0.19 | 0.19 | ± 0.03 | 1 |
|    |        |         | 14 | 247  | 0.28 | 0.29 | ± 0.04 | 1 |
|    |        |         | 12 | 494  | 0.69 | 0.71 | ± 0.10 | 1 |
|    |        |         | 10 | 839  | 1.61 | 1.65 | ± 0.24 | 2 |
|    |        |         | 8  | 1204 | 1.15 | 1.18 | ± 0.17 | 1 |
|    |        |         | 6  | 1480 | 0.89 | 0.91 | ± 0.13 | 1 |
|    |        |         | 4  | 1775 | 1.23 | 1.26 | ± 0.18 | 1 |
| 38 | 58.843 | -31.267 | 2  | 2212 | 1.48 | 1.52 | ± 0.22 | 1 |
|    |        |         | 21 | 20   | 0.46 | 0.47 | ± 0.07 | 2 |
|    |        |         | 20 | 30   | 0.24 | 0.25 | ± 0.04 | 2 |
|    |        |         | 19 | 49   | 0.26 | 0.27 | ± 0.04 | 2 |
|    |        |         | 17 | 59   | 0.31 | 0.32 | ± 0.05 | 2 |
|    |        |         | 16 | 69   | 0.27 | 0.28 | ± 0.04 | 2 |
|    |        |         | 14 | 100  | 0.37 | 0.38 | ± 0.06 | 2 |
|    |        |         | 12 | 199  | 0.61 | 0.63 | ± 0.09 | 2 |
|    |        |         | 11 | 297  | 0.62 | 0.64 | ± 0.09 | 2 |
|    |        |         | 10 | 397  | 0.62 | 0.64 | ± 0.09 | 2 |
| 40 | 59.102 | -33.828 | 9  | 495  | 0.93 | 0.95 | ± 0.14 | 2 |
|    |        |         | 8  | 569  | 0.69 | 0.71 | ± 0.10 | 2 |
|    |        |         | 7  | 644  | 0.78 | 0.80 | ± 0.12 | 2 |
|    |        |         | 6  | 792  | 0.69 | 0.71 | ± 0.10 | 2 |
|    |        |         | 5  | 940  | 1.12 | 1.15 | ± 0.17 | 2 |
|    |        |         | 4  | 990  | 1.21 | 1.24 | ± 0.18 | 2 |
|    |        |         | 3  | 1149 | 1.08 | 1.11 | ± 0.16 | 2 |
|    |        |         | 2  | 1285 | 0.74 | 0.76 | ± 0.11 | 2 |
|    |        |         | 1  | 1337 | 1.23 | 1.26 | ± 0.19 | 2 |
|    |        |         | 22 | 20   | 0.38 | 0.39 | ± 0.05 | 1 |
|    |        |         | 20 | 37   | 0.56 | 0.57 | ± 0.08 | 1 |
|    |        |         | 18 | 68   | 0.66 | 0.68 | ± 0.09 | 1 |
|    |        |         | 16 | 149  | 0.84 | 0.86 | ± 0.12 | 1 |
|    |        |         | 14 | 346  | 0.89 | 0.91 | ± 0.12 | 1 |
|    |        |         | 12 | 593  | 0.95 | 0.97 | ± 0.13 | 1 |
|    |        |         | 10 | 988  | 1.19 | 1.22 | ± 0.17 | 1 |

|    |        |         |      |        |      |      |        |   |
|----|--------|---------|------|--------|------|------|--------|---|
| 42 | 59.363 | -36.397 | 8    | 1282   | 3.30 | 3.38 | ± 0.46 | 3 |
|    |        |         | 6    | 1578   | 2.13 | 2.18 | ± 0.30 | 2 |
|    |        |         | 4    | 2069   | 1.37 | 1.40 | ± 0.19 | 1 |
|    |        |         | 2    | 2273   | 1.25 | 1.28 | ± 0.17 | 1 |
|    |        |         | 22   | 20     | 0.35 | 0.36 | ± 0.05 | 1 |
|    |        |         | 21   | 35     | 0.69 | 0.71 | ± 0.10 | 3 |
|    |        |         | 20   | 50     | 0.37 | 0.38 | ± 0.05 | 1 |
|    |        |         | 19   | 70     | 0.57 | 0.58 | ± 0.08 | 1 |
|    |        |         | 18   | 99     | 0.97 | 0.99 | ± 0.14 | 1 |
|    |        |         | 17   | 199    | 0.95 | 0.97 | ± 0.13 | 1 |
|    |        |         | 16   | 297    | 0.71 | 0.73 | ± 0.10 | 1 |
|    |        |         | 15   | 397    | 0.85 | 0.87 | ± 0.12 | 1 |
|    |        |         | 14   | 495    | 0.78 | 0.80 | ± 0.11 | 1 |
|    |        |         | 13   | 693    | 0.84 | 0.86 | ± 0.12 | 1 |
|    |        |         | 12   | 890    | 1.06 | 1.09 | ± 0.15 | 1 |
|    |        |         | 11   | 1038   | 0.82 | 0.84 | ± 0.11 | 1 |
|    |        |         | 10   | 1186   | 0.91 | 0.93 | ± 0.13 | 1 |
|    |        |         | 9    | 1383   | 1.69 | 1.73 | ± 0.24 | 3 |
|    |        |         | 8    | 1580   | 2.39 | 2.45 | ± 0.34 | 3 |
|    |        |         | 7    | 1777   | 1.09 | 1.12 | ± 0.15 | 1 |
|    |        |         | 6    | 1973   | 1.93 | 1.98 | ± 0.27 | 3 |
| 5  | 2217   | 1.27    | 1.30 | ± 0.18 | 1    |      |        |   |
| 4  | 2462   | 1.44    | 1.48 | ± 0.20 | 1    |      |        |   |
| 3  | 2854   | 1.02    | 1.05 | ± 0.14 | 1    |      |        |   |
| 2  | 3048   | 1.64    | 1.68 | ± 0.23 | 1    |      |        |   |
| 1  | 3078   | 0.96    | 0.98 | ± 0.13 | 1    |      |        |   |
| 44 | 59.623 | -38.954 | 22   | 21     | 1.33 | 1.37 | ± 0.13 | 3 |
|    |        |         | 21   | 31     | 0.54 | 0.55 | ± 0.05 | 1 |
|    |        |         | 20   | 40     | 0.50 | 0.51 | ± 0.05 | 1 |
|    |        |         | 19   | 50     | 1.01 | 1.04 | ± 0.10 | 1 |
|    |        |         | 18   | 100    | 1.25 | 1.28 | ± 0.12 | 2 |
|    |        |         | 17   | 198    | 0.80 | 0.82 | ± 0.08 | 1 |
|    |        |         | 16   | 299    | 0.65 | 0.67 | ± 0.06 | 1 |
|    |        |         | 15   | 496    | 2.08 | 2.13 | ± 0.21 | 1 |
|    |        |         | 14   | 693    | 0.98 | 1.00 | ± 0.10 | 1 |
|    |        |         | 13   | 891    | 1.23 | 1.26 | ± 0.12 | 1 |



|    |        |         |    |      |      |      |        |   |
|----|--------|---------|----|------|------|------|--------|---|
|    |        |         | 12 | 990  | 0.73 | 0.75 | ± 0.07 | 1 |
|    |        |         | 11 | 1087 | 0.96 | 0.98 | ± 0.10 | 1 |
|    |        |         | 10 | 1236 | 1.14 | 1.17 | ± 0.11 | 1 |
|    |        |         | 9  | 1382 | 1.14 | 1.17 | ± 0.11 | 1 |
|    |        |         | 8  | 1581 | 1.25 | 1.28 | ± 0.12 | 1 |
|    |        |         | 7  | 1776 | 1.20 | 1.23 | ± 0.12 | 1 |
|    |        |         | 6  | 1972 | 1.05 | 1.08 | ± 0.11 | 1 |
|    |        |         | 5  | 2218 | 1.70 | 1.74 | ± 0.17 | 2 |
|    |        |         | 4  | 2560 | 2.45 | 2.51 | ± 0.25 | 2 |
|    |        |         | 3  | 2754 | 1.99 | 2.04 | ± 0.20 | 2 |
|    |        |         | 2  | 2854 | 1.14 | 1.17 | ± 0.11 | 1 |
|    |        |         | 1  | 2915 | 1.34 | 1.37 | ± 0.13 | 2 |
| 49 | 59.773 | -41.297 | 22 | 19   | 0.25 | 0.26 | ± 0.02 | 1 |
|    |        |         | 21 | 40   | 0.33 | 0.34 | ± 0.02 | 1 |
|    |        |         | 20 | 61   | 0.42 | 0.43 | ± 0.03 | 1 |
|    |        |         | 19 | 80   | 0.45 | 0.46 | ± 0.03 | 1 |
|    |        |         | 18 | 101  | 0.45 | 0.46 | ± 0.03 | 1 |
|    |        |         | 17 | 198  | 0.89 | 0.91 | ± 0.06 | 1 |
|    |        |         | 16 | 297  | 0.96 | 0.98 | ± 0.07 | 1 |
|    |        |         | 15 | 396  | 1.18 | 1.21 | ± 0.08 | 1 |
|    |        |         | 14 | 544  | 1.75 | 1.80 | ± 0.12 | 3 |
|    |        |         | 13 | 593  | 1.02 | 1.05 | ± 0.07 | 1 |
|    |        |         | 12 | 693  | 0.98 | 1.00 | ± 0.07 | 1 |
|    |        |         | 11 | 792  | 1.17 | 1.20 | ± 0.08 | 1 |
|    |        |         | 10 | 891  | 0.97 | 0.99 | ± 0.07 | 1 |
|    |        |         | 9  | 989  | 1.15 | 1.18 | ± 0.08 | 1 |
|    |        |         | 8  | 1088 | 1.78 | 1.82 | ± 0.12 | 3 |
|    |        |         | 7  | 1235 | 1.25 | 1.28 | ± 0.09 | 1 |
|    |        |         | 6  | 1482 | 1.32 | 1.35 | ± 0.09 | 1 |
|    |        |         | 5  | 1629 | 1.53 | 1.57 | ± 0.11 | 1 |
|    |        |         | 4  | 1776 | 1.12 | 1.15 | ± 0.08 | 1 |
|    |        |         | 3  | 1873 | 1.35 | 1.38 | ± 0.09 | 1 |
|    |        |         | 2  | 1972 | 1.26 | 1.29 | ± 0.09 | 1 |
|    |        |         | 1  | 2022 | 1.11 | 1.14 | ± 0.08 | 1 |
| 53 | 59.902 | -43.015 | 16 | 55   | 1.17 | 1.20 | ± 0.12 | 1 |
|    |        |         | 12 | 70   | 1.43 | 1.47 | ± 0.14 | 1 |

|           |        |         |           |        |         |      |        |      |
|-----------|--------|---------|-----------|--------|---------|------|--------|------|
| <b>56</b> | 59.823 | -42.399 | 8         | 100    | 1.93    | 1.98 | ± 0.19 | 1    |
|           |        |         | 4         | 129    | 1.85    | 1.90 | ± 0.19 | 1    |
|           |        |         | 1         | 164    | 2.99    | 3.06 | ± 0.30 | 1    |
|           |        |         | 22        | 20     | 0.85    | 0.87 | ± 0.06 | 1    |
|           |        |         | 20        | 40     | 0.50    | 0.51 | ± 0.03 | 1    |
|           |        |         | 16        | 60     | 0.55    | 0.56 | ± 0.04 | 1    |
|           |        |         | 14        | 119    | 1.84    | 1.89 | ± 0.13 | 3    |
|           |        |         | 10        | 168    | 0.29    | 0.30 | ± 0.02 | 1    |
|           |        |         | 6         | 246    | 0.33    | 0.34 | ± 0.02 | 1    |
|           |        |         | 2         | 296    | 0.42    | 0.43 | ± 0.03 | 1    |
| <b>60</b> | 59.799 | -42.004 | 22        | 19     | 0.24    | 0.25 | ± 0.02 | 1    |
|           |        |         | 21        | 28     | 0.22    | 0.23 | ± 0.02 | 1    |
|           |        |         | 20        | 38     | 0.84    | 0.86 | ± 0.08 | 3    |
|           |        |         | 19        | 59     | 0.36    | 0.37 | ± 0.04 | 1    |
|           |        |         | 18        | 77     | 0.39    | 0.40 | ± 0.04 | 1    |
|           |        |         | 17        | 99     | 0.40    | 0.41 | ± 0.04 | 1    |
|           |        |         | 16        | 149    | 0.45    | 0.46 | ± 0.05 | 1    |
|           |        |         | 15        | 199    | 0.71    | 0.73 | ± 0.07 | 1    |
|           |        |         | 14        | 248    | 0.69    | 0.71 | ± 0.07 | 1    |
|           |        |         | 13        | 297    | 0.62    | 0.64 | ± 0.06 | 1    |
|           |        |         | 12        | 345    | 0.79    | 0.81 | ± 0.08 | 1    |
|           |        |         | 11        | 445    | 0.77    | 0.79 | ± 0.08 | 1    |
|           |        |         | 10        | 543    | 0.73    | 0.75 | ± 0.07 | 1    |
|           |        |         | 9         | 642    | 0.77    | 0.79 | ± 0.08 | 1    |
|           |        |         | 8         | 741    | 0.86    | 0.88 | ± 0.09 | 1    |
|           |        |         | 6         | 938    | 1.02    | 1.05 | ± 0.10 | 1    |
|           |        |         | 5         | 1137   | 1.09    | 1.12 | ± 0.11 | 1    |
|           |        |         | 4         | 1284   | 1.04    | 1.07 | ± 0.10 | 1    |
|           |        |         | 3         | 1480   | 0.94    | 0.96 | ± 0.09 | 1    |
|           |        |         | <b>61</b> | 59.753 | -45.112 | 2    | 1625   | 1.02 |
| 1         | 1714   | 0.98    |           |        |         | 1.00 | ± 0.10 | 1    |
| 12        | 23     | 0.77    |           |        |         | 0.79 | ± 0.12 | 1    |
| 9         | 50     | 1.21    |           |        |         | 1.24 | ± 0.18 | 1    |
| 7         | 70     | 0.56    |           |        |         | 0.57 | ± 0.08 | 1    |
| 5         | 100    | 1.72    |           |        |         | 1.76 | ± 0.26 | 1    |
| 3         | 120    | 2.21    |           |        |         | 2.27 | ± 0.33 | 1    |

|    |        |         |      |        |      |      |        |   |
|----|--------|---------|------|--------|------|------|--------|---|
| 63 | 59.434 | -45.666 | 1    | 137    | 1.73 | 1.77 | ± 0.26 | 1 |
|    |        |         | 12   | 20     | 0.39 | 0.40 | ± 0.03 | 1 |
|    |        |         | 10   | 70     | 1.39 | 1.43 | ± 0.10 | 3 |
|    |        |         | 9    | 99     | 0.68 | 0.70 | ± 0.05 | 1 |
|    |        |         | 8    | 198    | 0.64 | 0.66 | ± 0.04 | 1 |
|    |        |         | 7    | 297    | 0.61 | 0.63 | ± 0.04 | 1 |
|    |        |         | 6    | 396    | 0.69 | 0.71 | ± 0.05 | 1 |
|    |        |         | 5    | 495    | 0.64 | 0.66 | ± 0.05 | 1 |
|    |        |         | 4    | 840    | 0.65 | 0.67 | ± 0.05 | 1 |
|    |        |         | 3    | 1083   | 0.71 | 0.73 | ± 0.05 | 1 |
| 64 | 59.068 | -46.083 | 2    | 1284   | 0.85 | 0.87 | ± 0.06 | 1 |
|    |        |         | 1    | 1537   | 0.78 | 0.80 | ± 0.05 | 1 |
|    |        |         | 22   | 15     | 0.30 | 0.31 | ± 0.04 | 1 |
|    |        |         | 21   | 25     | 0.22 | 0.23 | ± 0.03 | 1 |
|    |        |         | 20   | 35     | 0.26 | 0.27 | ± 0.03 | 1 |
|    |        |         | 19   | 50     | 0.40 | 0.41 | ± 0.05 | 1 |
|    |        |         | 18   | 100    | 0.70 | 0.72 | ± 0.08 | 1 |
|    |        |         | 17   | 150    | 0.78 | 0.80 | ± 0.09 | 1 |
|    |        |         | 16   | 198    | 0.79 | 0.81 | ± 0.09 | 1 |
|    |        |         | 15   | 317    | 0.89 | 0.91 | ± 0.11 | 1 |
|    |        |         | 14   | 397    | 0.85 | 0.87 | ± 0.10 | 1 |
|    |        |         | 13   | 496    | 0.79 | 0.81 | ± 0.09 | 1 |
|    |        |         | 12   | 693    | 0.81 | 0.83 | ± 0.10 | 1 |
|    |        |         | 11   | 792    | 0.75 | 0.77 | ± 0.09 | 1 |
|    |        |         | 10   | 890    | 0.95 | 0.97 | ± 0.11 | 1 |
|    |        |         | 9    | 1038   | 1.03 | 1.06 | ± 0.12 | 1 |
|    |        |         | 8    | 1137   | 0.96 | 0.98 | ± 0.11 | 1 |
|    |        |         | 7    | 1383   | 0.93 | 0.95 | ± 0.11 | 1 |
|    |        |         | 6    | 1580   | 0.99 | 1.01 | ± 0.12 | 1 |
|    |        |         | 5    | 1776   | 0.92 | 0.94 | ± 0.11 | 1 |
| 4  | 1973   | 2.10    | 2.16 | ± 0.25 | 3    |      |        |   |
| 3  | 2120   | 0.98    | 1.00 | ± 0.12 | 1    |      |        |   |
| 2  | 2365   | 0.99    | 1.01 | ± 0.12 | 1    |      |        |   |
| 1  | 2464   | 1.05    | 1.08 | ± 0.13 | 1    |      |        |   |
| 68 | 56.916 | -47.422 | 13   | 20     | 0.21 | 0.22 | ± 0.01 | 1 |
|    |        |         | 12   | 29     | 0.11 | 0.11 | ± 0.01 | 1 |

|    |        |         |    |      |      |      |        |   |
|----|--------|---------|----|------|------|------|--------|---|
|    |        |         | 10 | 35   | 0.26 | 0.27 | ± 0.02 | 1 |
|    |        |         | 9  | 50   | 0.30 | 0.31 | ± 0.02 | 1 |
|    |        |         | 8  | 100  | 0.73 | 0.75 | ± 0.05 | 1 |
|    |        |         | 7  | 345  | 0.62 | 0.64 | ± 0.04 | 1 |
|    |        |         | 6  | 891  | 0.69 | 0.71 | ± 0.05 | 1 |
|    |        |         | 5  | 1382 | 0.61 | 0.63 | ± 0.04 | 1 |
|    |        |         | 4  | 1677 | 0.71 | 0.73 | ± 0.05 | 1 |
|    |        |         | 3  | 2463 | 0.85 | 0.87 | ± 0.06 | 1 |
|    |        |         | 2  | 3342 | 0.68 | 0.70 | ± 0.05 | 1 |
|    |        |         | 1  | 3574 | 0.68 | 0.70 | ± 0.05 | 1 |
| 69 | 55.842 | -48.093 | 22 | 14   | 0.23 | 0.24 | ± 0.02 | 1 |
|    |        |         | 21 | 26   | 0.18 | 0.18 | ± 0.01 | 1 |
|    |        |         | 20 | 30   | 0.22 | 0.23 | ± 0.02 | 1 |
|    |        |         | 19 | 40   | 0.35 | 0.36 | ± 0.02 | 1 |
|    |        |         | 18 | 60   | 0.64 | 0.65 | ± 0.04 | 3 |
|    |        |         | 17 | 90   | 0.47 | 0.48 | ± 0.03 | 1 |
|    |        |         | 16 | 128  | 0.62 | 0.64 | ± 0.04 | 1 |
|    |        |         | 15 | 178  | 0.64 | 0.66 | ± 0.04 | 1 |
|    |        |         | 14 | 495  | 0.86 | 0.88 | ± 0.06 | 1 |
|    |        |         | 13 | 792  | 0.74 | 0.76 | ± 0.05 | 1 |
|    |        |         | 12 | 1087 | 1.10 | 1.13 | ± 0.08 | 2 |
|    |        |         | 10 | 1381 | 0.79 | 0.81 | ± 0.06 | 1 |
|    |        |         | 9  | 1580 | 0.90 | 0.92 | ± 0.06 | 1 |
|    |        |         | 8  | 1776 | 0.84 | 0.86 | ± 0.06 | 1 |
|    |        |         | 7  | 2071 | 0.78 | 0.80 | ± 0.05 | 1 |
|    |        |         | 6  | 2365 | 0.95 | 0.97 | ± 0.07 | 1 |
|    |        |         | 5  | 2757 | 0.95 | 0.97 | ± 0.07 | 1 |
|    |        |         | 4  | 3196 | 0.76 | 0.78 | ± 0.05 | 1 |
|    |        |         | 3  | 3440 | 0.60 | 0.62 | ± 0.04 | 1 |
|    |        |         | 2  | 3635 | 0.63 | 0.65 | ± 0.04 | 1 |
|    |        |         | 1  | 3669 | 0.61 | 0.63 | ± 0.04 | 1 |
| 71 | 53.692 | -49.433 | 22 | 20   | 0.28 | 0.29 | ± 0.02 | 1 |
|    |        |         | 21 | 30   | 0.34 | 0.35 | ± 0.02 | 1 |
|    |        |         | 20 | 40   | 0.53 | 0.54 | ± 0.04 | 1 |
|    |        |         | 19 | 50   | 0.22 | 0.23 | ± 0.02 | 1 |
|    |        |         | 18 | 60   | 0.33 | 0.34 | ± 0.02 | 1 |

|    |        |         |    |      |      |      |        |   |
|----|--------|---------|----|------|------|------|--------|---|
|    |        |         | 17 | 100  | 0.61 | 0.63 | ± 0.04 | 1 |
|    |        |         | 16 | 149  | 0.64 | 0.66 | ± 0.04 | 1 |
|    |        |         | 15 | 248  | 0.73 | 0.75 | ± 0.05 | 1 |
|    |        |         | 14 | 347  | 0.79 | 0.81 | ± 0.05 | 1 |
|    |        |         | 13 | 496  | 0.81 | 0.83 | ± 0.06 | 1 |
|    |        |         | 12 | 792  | 0.67 | 0.69 | ± 0.05 | 1 |
|    |        |         | 10 | 1187 | 0.81 | 0.83 | ± 0.06 | 1 |
|    |        |         | 9  | 1383 | 0.84 | 0.86 | ± 0.06 | 1 |
|    |        |         | 8  | 1678 | 2.17 | 2.23 | ± 0.15 | 3 |
|    |        |         | 7  | 1974 | 0.72 | 0.74 | ± 0.05 | 1 |
|    |        |         | 6  | 2366 | 0.78 | 0.80 | ± 0.05 | 1 |
|    |        |         | 5  | 2709 | 1.02 | 1.04 | ± 0.07 | 3 |
|    |        |         | 4  | 2952 | 0.83 | 0.85 | ± 0.06 | 1 |
|    |        |         | 2  | 3440 | 0.68 | 0.70 | ± 0.05 | 1 |
|    |        |         | 1  | 3689 | 0.73 | 0.75 | ± 0.05 | 1 |
| 77 | 53     | -51.1   | 22 | 15   | 0.28 | 0.29 | ± 0.02 | 1 |
|    |        |         | 21 | 30   | 0.26 | 0.27 | ± 0.02 | 1 |
|    |        |         | 20 | 40   | 0.31 | 0.32 | ± 0.02 | 1 |
|    |        |         | 19 | 60   | 0.55 | 0.56 | ± 0.04 | 1 |
|    |        |         | 18 | 80   | 0.56 | 0.57 | ± 0.04 | 1 |
|    |        |         | 17 | 100  | 0.77 | 0.79 | ± 0.05 | 1 |
|    |        |         | 16 | 149  | 0.90 | 0.92 | ± 0.06 | 1 |
|    |        |         | 15 | 396  | 1.21 | 1.24 | ± 0.09 | 2 |
|    |        |         | 14 | 693  | 0.96 | 0.98 | ± 0.07 | 1 |
|    |        |         | 13 | 989  | 0.83 | 0.85 | ± 0.06 | 1 |
|    |        |         | 12 | 1088 | 0.87 | 0.89 | ± 0.06 | 1 |
|    |        |         | 10 | 1186 | 0.96 | 0.98 | ± 0.07 | 1 |
|    |        |         | 9  | 1285 | 0.95 | 0.97 | ± 0.07 | 1 |
|    |        |         | 8  | 1482 | 0.90 | 0.92 | ± 0.06 | 1 |
|    |        |         | 7  | 1679 | 0.95 | 0.97 | ± 0.07 | 1 |
|    |        |         | 6  | 1875 | 0.92 | 0.94 | ± 0.06 | 1 |
|    |        |         | 5  | 2072 | 1.01 | 1.04 | ± 0.07 | 1 |
|    |        |         | 4  | 2366 | 0.94 | 0.96 | ± 0.07 | 1 |
|    |        |         | 2  | 2415 | 0.93 | 0.95 | ± 0.07 | 1 |
|    |        |         | 1  | 2506 | 0.88 | 0.90 | ± 0.06 | 1 |
| 78 | 51.989 | -53.817 | 12 | 12   | 0.77 | 0.79 | ± 0.05 | 1 |

|   |     |      |      |        |   |
|---|-----|------|------|--------|---|
| 9 | 36  | 1.15 | 1.18 | ± 0.08 | 1 |
| 7 | 139 | 2.36 | 2.42 | ± 0.17 | 1 |
| 5 | 248 | 4.02 | 4.12 | ± 0.28 | 1 |
| 4 | 288 | 3.23 | 3.31 | ± 0.23 | 1 |
| 1 | 368 | 7.64 | 7.83 | ± 0.53 | 1 |

---
